# Supplementary material
Source: publisher figshare collection journal article supplement (https://acs.figshare.com/ndownloader/files/4578214)
Supplement: Supplementary file 1 [file 4578214]

**Supplementary Table 1. Preys in the arrayed set used in the MAPPIT screening experiment**

| gene ID | symbol   | description                                                                                                     |
|---------|----------|-----------------------------------------------------------------------------------------------------------------|
| 57228   | LOC57228 | small trans-membrane and glycosylated protein                                                                   |
| 11158   | RABL2B   | RAB, member of RAS oncogene family-like 2B                                                                      |
| 51083   | GAL      | galanin                                                                                                         |
| 10842   | C7orf16  | chromosome 7 open reading frame 16                                                                              |
| 2767    | GNA11    | guanine nucleotide binding protein (G protein), alpha 11 (Gq class)                                             |
| 5997    | RGS2     | regulator of G-protein signalling 2, 24kDa                                                                      |
| 9545    | RAB3D    | RAB3D, member RAS oncogene family                                                                               |
| 1908    | EDN3     | endothelin 3                                                                                                    |
| 1154    | CISH     | cytokine inducible SH2-containing protein                                                                       |
| 1316    | KLF6     | Kruppel-like factor 6                                                                                           |
| 8851    | CDK5R1   | cyclin-dependent kinase 5, regulatory subunit 1 (p35)                                                           |
| 728     | C5AR1    | complement component 5a receptor 1                                                                              |
| 2045    | EPHA7    | EPH receptor A7                                                                                                 |
| 27296   | C20orf10 | chromosome 20 open reading frame 10                                                                             |
| 5015    | OTX2     | orthodenticle homolog 2 (Drosophila)                                                                            |
| 136     | ADORA2B  | adenosine A2b receptor                                                                                          |
| 3824    | KLRD1    | killer cell lectin-like receptor subfamily D, member 1                                                          |
| 116442  | RAB39B   | RAB39B, member RAS oncogene family                                                                              |
| 26027   | ACOT11   | acyl-CoA thioesterase 11                                                                                        |
| 2258    | FGF13    | fibroblast growth factor 13                                                                                     |
| 117289  | TAGAP    | T-cell activation GTPase activating protein                                                                     |
| 161003  | STOML3   | stomatin (EPB72)-like 3                                                                                         |
| 57019   | CIAPIN1  | cytokine induced apoptosis inhibitor 1                                                                          |
| 11171   | STRAP    | serine/threonine kinase receptor associated protein                                                             |
| 56940   | DUSP22   | dual specificity phosphatase 22                                                                                 |
| 2043    | EPHA4    | EPH receptor A4                                                                                                 |
| 4693    | NDP      | Norrie disease (pseudoglioma)                                                                                   |
| 161253  | REM2     | RAS (RAD and GEM)-like GTP binding 2                                                                            |
| 121268  | RHEBL1   | Ras homolog enriched in brain like 1                                                                            |
| 932     | MS4A3    | membrane-spanning 4-domains, subfamily A, member 3 (hematopoietic cell-specific)                                |
| 57045   | TWSG1    | twisted gastrulation homolog 1 (Drosophila)                                                                     |
| 51107   | APH1A    | anterior pharynx defective 1 homolog A (C. elegans)                                                             |
| 81629   | TSSK3    | testis-specific serine kinase 3                                                                                 |
| 4869    | NPM1     | nucleophosmin (nucleolar phosphoprotein B23, numatrin)                                                          |
| 4792    | NFKBIA   | nuclear factor of kappa light polypeptide gene enhancer in B-cells inhibitor, alpha                             |
| 64112   | MOAP1    | modulator of apoptosis 1                                                                                        |
| 8396    | PIP5K2B  | phosphatidylinositol-4-phosphate 5-kinase, type II, beta                                                        |
| 2919    | CXCL1    | chemokine (C-X-C motif) ligand 1 (melanoma growth stimulating activity, alpha)                                  |
| 9290    | GPR55    | G protein-coupled receptor 55                                                                                   |
| 6256    | RXRA     | retinoid X receptor, alpha                                                                                      |
| 5880    | RAC2     | ras-related C3 botulinum toxin substrate 2 (rho family, small GTP binding protein Rac2)                         |
| 5868    | RAB5A    | RAB5A, member RAS oncogene family                                                                               |
| 10231   | DSCR1L1  | Down syndrome critical region gene 1-like 1                                                                     |
| 8800    | PEX11A   | peroxisomal biogenesis factor 11A                                                                               |
| 54472   | TOLLIP   | toll interacting protein                                                                                        |
| 3921    | RPSA     | ribosomal protein SA                                                                                            |
| 54584   | GNB1L    | guanine nucleotide binding protein (G protein), beta polypeptide 1-like                                         |
| 9456    | HOMER1   | homer homolog 1 (Drosophila)                                                                                    |
| 6277    | S100A6   | S100 calcium binding protein A6                                                                                 |
| 142913  | CFLP1    | cofilin pseudogene 1                                                                                            |
| 29909   | GPR171   | G protein-coupled receptor 171                                                                                  |
| 84904   | C9orf100 | chromosome 9 open reading frame 100                                                                             |
| 85004   | RERG     | RAS-like, estrogen-regulated, growth inhibitor                                                                  |
| 3146    | HMGB1    | high-mobility group box 1                                                                                       |
| 113178  | SCAMP4   | secretory carrier membrane protein 4                                                                            |
| 7532    | YWHAG    | tyrosine 3-monooxygenase/tryptophan 5-monooxygenase activation protein, gamma polypeptide                       |
| 6251    | RSU1     | Ras suppressor protein 1                                                                                        |
| 2669    | GEM      | GTP binding protein overexpressed in skeletal muscle                                                            |
| 1676    | DFFA     | DNA fragmentation factor, 45kDa, alpha polypeptide                                                              |
| 2771    | GNAI2    | guanine nucleotide binding protein (G protein), alpha inhibiting activity polypeptide 2                         |
| 4215    | MAP3K3   | mitogen-activated protein kinase kinase kinase 3                                                                |
| 22858   | ICK      | intestinal cell (MAK-like) kinase                                                                               |
| 83937   | RASSF4   | Ras association (RalGDS/AF-6) domain family 4                                                                   |
| 84152   | PPP1R1B  | protein phosphatase 1, regulatory (inhibitor) subunit 1B (dopamine and cAMP regulated phosphoprotein, DARPP-32) |
| 969     | CD69     | CD69 molecule                                                                                                   |
| 8766    | RAB11A   | RAB11A, member RAS oncogene family                                                                              |
| 11158   | RABL2B   | RAB, member of RAS oncogene family-like 2B                                                                      |
| 2810    | SFN      | stratifin                                                                                                       |
| 3612    | IMPA1    | inositol(myo)-1(or 4)-monophosphatase 1                                                                         |

|        |          |                                                                                         |
|--------|----------|-----------------------------------------------------------------------------------------|
| 2784   | GNB3     | guanine nucleotide binding protein (G protein), beta polypeptide 3                      |
| 4046   | LSP1     | lymphocyte-specific protein 1                                                           |
| 2771   | GNAI2    | guanine nucleotide binding protein (G protein), alpha inhibiting activity polypeptide 2 |
| 6352   | CCL5     | chemokine (C-C motif) ligand 5                                                          |
| 7305   | TYROBP   | TYRO protein tyrosine kinase binding protein                                            |
| 1139   | CHRNA7   | cholinergic receptor, nicotinic, alpha 7                                                |
| 8477   | GPR65    | G protein-coupled receptor 65                                                           |
| 54469  | ZFAND6   | zinc finger, AN1-type domain 6                                                          |
| 5901   | RAN      | RAN, member RAS oncogene family                                                         |
| 7879   | RAB7A    | RAB7A, member RAS oncogene family                                                       |
| 83871  | RAB34    | RAB34, member RAS oncogene family                                                       |
| 6456   | SH3GL2   | SH3-domain GRB2-like 2                                                                  |
| 9649   | RALGPS1  | Ral GEF with PH domain and SH3 binding motif 1                                          |
| 2783   | GNB2     | guanine nucleotide binding protein (G protein), beta polypeptide 2                      |
| 6347   | CCL2     | chemokine (C-C motif) ligand 2                                                          |
| 9607   | CARTPT   | CART prepropeptide                                                                      |
| 2764   | GMFB     | glia maturation factor, beta                                                            |
| 7078   | TIMP3    | TIMP metalloproteinase inhibitor 3 (Sorsby fundus dystrophy, pseudoinflammatory)        |
| 142679 | DUSP19   | dual specificity phosphatase 19                                                         |
| 57186  | C20orf74 | chromosome 20 open reading frame 74                                                     |
| 51267  | CLEC1A   | C-type lectin domain family 1, member A                                                 |
| 9111   | NMI      | N-myc (and STAT) interactor                                                             |
| 2357   | FPR1     | formyl peptide receptor 1                                                               |
| 23580  | CDC42EP4 | CDC42 effector protein (Rho GTPase binding) 4                                           |
| 26256  | CABYR    | calcium binding tyrosine-(Y)-phosphorylation regulated (fibrousheathin 2)               |
| 3628   | INPP1    | inositol polyphosphate-1-phosphatase                                                    |
| 3624   | INHBA    | inhibin, beta A (activin A, activin AB alpha polypeptide)                               |
| 1201   | CLN3     | ceroid-lipofuscinosis, neuronal 3, juvenile (Batten, Spielmeier-Vogt disease)           |
| 2558   | GABRA5   | gamma-aminobutyric acid (GABA) A receptor, alpha 5                                      |
| 6464   | SHC1     | SHC (Src homology 2 domain containing) transforming protein 1                           |
| 26959  | HBP1     | HMG-box transcription factor 1                                                          |
| 10298  | PAK4     | p21(CDKN1A)-activated kinase 4                                                          |
| 7064   | THOP1    | thimet oligopeptidase 1                                                                 |
| 64857  | PLEKHG2  | pleckstrin homology domain containing, family G (with RhoGef domain) member 2           |
| 11261  | CHP      | calcium binding protein P22                                                             |
| 4793   | NFKBIB   | nuclear factor of kappa light polypeptide gene enhancer in B-cells inhibitor, beta      |
| 2237   | FEN1     | flap structure-specific endonuclease 1                                                  |
| 124583 | CANT1    | calcium activated nucleotidase 1                                                        |
| 10494  | STK25    | serine/threonine kinase 25 (STE20 homolog, yeast)                                       |
| 25771  | TBC1D22A | TBC1 domain family, member 22A                                                          |
| 3190   | HNRPK    | heterogeneous nuclear ribonucleoprotein K                                               |
| 7205   | TRIP6    | thyroid hormone receptor interactor 6                                                   |
| 23636  | NUP62    | nucleoporin 62kDa                                                                       |
| 8829   | NRP1     | neuropilin 1                                                                            |
| 322    | APBB1    | amyloid beta (A4) precursor protein-binding, family B, member 1 (Fe65)                  |
| 22937  | SCAP     | SREBF chaperone                                                                         |
| 9315   | C5orf13  | chromosome 5 open reading frame 13                                                      |
| 81029  | WNT5B    | wingless-type MMTV integration site family, member 5B                                   |
| 23061  | TBC1D9B  | TBC1 domain family, member 9B (with GRAM domain)                                        |
| 10206  | TRIM13   | tripartite motif-containing 13                                                          |
| 25970  | SH2B1    | SH2B adaptor protein 1                                                                  |
| 8878   | SQSTM1   | sequestosome 1                                                                          |
| 4090   | SMAD5    | SMAD family member 5                                                                    |
| 7205   | TRIP6    | thyroid hormone receptor interactor 6                                                   |
| 7464   | CORO2A   | coronin, actin binding protein, 2A                                                      |
| 55684  | C9orf86  | chromosome 9 open reading frame 86                                                      |
| 9744   | CENTB1   | centaurin, beta 1                                                                       |
| 84976  | DISP1    | dispatched homolog 1 (Drosophila)                                                       |
| 338382 | RAB7B    | RAB7B, member RAS oncogene family                                                       |
| 51567  | TTRAP    | TRAF and TNF receptor associated protein                                                |
| 2778   | GNAS     | GNAS complex locus                                                                      |
| 59307  | SIGIRR   | single immunoglobulin and toll-interleukin 1 receptor (TIR) domain                      |
| 10587  | TXNRD2   | thioredoxin reductase 2                                                                 |
| 30001  | ERO1L    | ERO1-like (S. cerevisiae)                                                               |
| 1816   | DRD5     | dopamine receptor D5                                                                    |
| 64396  | GMCL1L   | germ cell-less homolog 1 (Drosophila)-like                                              |
| 113878 | DTX2     | deltex homolog 2 (Drosophila)                                                           |
| 6774   | STAT3    | signal transducer and activator of transcription 3 (acute-phase response factor)        |
| 9181   | ARHGEF2  | rho/rac guanine nucleotide exchange factor (GEF) 2                                      |
| 55970  | GNG12    | guanine nucleotide binding protein (G protein), gamma 12                                |
| 55698  | FLJ10324 | hypothetical protein FLJ10324                                                           |
| 2778   | GNAS     | GNAS complex locus                                                                      |
| 1455   | CSNK1G2  | casein kinase 1, gamma 2                                                                |
| 86     | ACTL6A   | actin-like 6A                                                                           |
| 2665   | GDI2     | GDP dissociation inhibitor 2                                                            |
| 55357  | TBC1D2   | TBC1 domain family, member 2                                                            |

|       |          |                                                                                              |
|-------|----------|----------------------------------------------------------------------------------------------|
| 51684 | SUFU     | suppressor of fused homolog (Drosophila)                                                     |
| 10922 | FASTK    | Fas-activated serine/threonine kinase                                                        |
| 6850  | SYK      | spleen tyrosine kinase                                                                       |
| 7088  | TLE1     | transducin-like enhancer of split 1 (E(sp1) homolog, Drosophila)                             |
| 9862  | THRAP4   | thyroid hormone receptor associated protein 4                                                |
| 9910  | RABGAP1L | RAB GTPase activating protein 1-like                                                         |
| 2769  | GNA15    | guanine nucleotide binding protein (G protein), alpha 15 (Gq class)                          |
| 2150  | F2RL1    | coagulation factor II (thrombin) receptor-like 1                                             |
| 56923 | NMUR2    | neuromedin U receptor 2                                                                      |
| 5328  | PLAU     | plasminogen activator, urokinase                                                             |
| 55846 | ITFG2    | integrin alpha FG-GAP repeat containing 2                                                    |
| 7071  | KLF10    | Kruppel-like factor 10                                                                       |
| 3059  | HCLS1    | hematopoietic cell-specific Lyn substrate 1                                                  |
| 3560  | IL2RB    | interleukin 2 receptor, beta                                                                 |
| 56848 | SPHK2    | sphingosine kinase 2                                                                         |
| 3688  | ITGB1    | integrin, beta 1 (fibronectin receptor, beta polypeptide, antigen CD29 includes MDF2, MSK12) |
| 6789  | STK4     | serine/threonine kinase 4                                                                    |
| 64411 | CENTD3   | centaurin, delta 3                                                                           |
| 51094 | ADIPOR1  | adiponectin receptor 1                                                                       |
| 6376  | CX3CL1   | chemokine (C-X3-C motif) ligand 1                                                            |
| 2847  | MCHR1    | melanin-concentrating hormone receptor 1                                                     |
| 2266  | FGG      | fibrinogen gamma chain                                                                       |
| 51776 | ZAK      | sterile alpha motif and leucine zipper containing kinase AZK                                 |
| 5129  | PTK3     | PCTAIRE protein kinase 3                                                                     |
| 64170 | CARD9    | caspase recruitment domain family, member 9                                                  |
| 8031  | NCOA4    | nuclear receptor coactivator 4                                                               |
| 27242 | TNFRSF21 | tumor necrosis factor receptor superfamily, member 21                                        |
| 9392  | TGFBRAP1 | transforming growth factor, beta receptor associated protein 1                               |
| 8821  | INPP4B   | inositol polyphosphate-4-phosphatase, type II, 105kDa                                        |
| 929   | CD14     | CD14 molecule                                                                                |
| 8877  | SPHK1    | sphingosine kinase 1                                                                         |
| 2149  | F2R      | coagulation factor II (thrombin) receptor                                                    |
| 7434  | VIPR2    | vasoactive intestinal peptide receptor 2                                                     |
| 29760 | BLNK     | B-cell linker                                                                                |
| 27242 | TNFRSF21 | tumor necrosis factor receptor superfamily, member 21                                        |
| 1136  | CHRNA3   | cholinergic receptor, nicotinic, alpha 3                                                     |
| 3959  | LGALS3BP | lectin, galactoside-binding, soluble, 3 binding protein                                      |
| 7064  | THOP1    | thimet oligopeptidase 1                                                                      |
| 55367 | LRDD     | leucine-rich repeats and death domain containing                                             |
| 55750 | AGK      | acylglycerol kinase                                                                          |
| 2785  | GNG3     | guanine nucleotide binding protein (G protein), gamma 3                                      |
| 3627  | CXCL10   | chemokine (C-X-C motif) ligand 10                                                            |
| 54205 | CYCS     | cytochrome c, somatic                                                                        |
| 29967 | LRP12    | low density lipoprotein-related protein 12                                                   |
| 638   | BIK      | BCL2-interacting killer (apoptosis-inducing)                                                 |
| 5912  | RAP2B    | RAP2B, member of RAS oncogene family                                                         |
| 664   | BNIP3    | BCL2/adenovirus E1B 19kDa interacting protein 3                                              |
| 27314 | RAB30    | RAB30, member RAS oncogene family                                                            |
| 11018 | TMED1    | transmembrane emp24 protein transport domain containing 1                                    |
| 54602 | NDFIP2   | Nedd4 family interacting protein 2                                                           |
| 3123  | HLA-DRB1 | major histocompatibility complex, class II, DR beta 1                                        |
| 9352  | TXNL1    | thioredoxin-like 1                                                                           |
| 64581 | CLEC7A   | C-type lectin domain family 7, member A                                                      |
| 2768  | GNA12    | guanine nucleotide binding protein (G protein) alpha 12                                      |
| 2921  | CXCL3    | chemokine (C-X-C motif) ligand 3                                                             |
| 51246 | SCOTIN   | scotin                                                                                       |
| 10728 | PTGES3   | prostaglandin E synthase 3 (cytosolic)                                                       |
| 5906  | RAP1A    | RAP1A, member of RAS oncogene family                                                         |
| 23509 | POFUT1   | protein O-fucosyltransferase 1                                                               |
| 8934  | RAB7L1   | RAB7, member RAS oncogene family-like 1                                                      |
| 9077  | DIRAS3   | DIRAS family, GTP-binding RAS-like 3                                                         |
| 4188  | MDFI     | MyoD family inhibitor                                                                        |
| 26207 | PITPNC1  | phosphatidylinositol transfer protein, cytoplasmic 1                                         |
| 9518  | GDF15    | growth differentiation factor 15                                                             |
| 23370 | ARHGEF18 | rho/rac guanine nucleotide exchange factor (GEF) 18                                          |
| 10159 | ATP6AP2  | ATPase, H <sup>+</sup> transporting, lysosomal accessory protein 2                           |
| 3630  | INS      | insulin                                                                                      |
| 4192  | MDK      | midkine (neurite growth-promoting factor 2)                                                  |
| 7070  | THY1     | Thy-1 cell surface antigen                                                                   |
| 402   | ARL2     | ADP-ribosylation factor-like 2                                                               |
| 56681 | SAR1A    | SAR1 gene homolog A (S. cerevisiae)                                                          |
| 51560 | RAB6B    | RAB6B, member RAS oncogene family                                                            |
| 598   | BCL2L1   | BCL2-like 1                                                                                  |
| 1134  | CHRNA1   | cholinergic receptor, nicotinic, alpha 1 (muscle)                                            |
| 5515  | PPP2CA   | protein phosphatase 2 (formerly 2A), catalytic subunit, alpha isoform                        |
| 6373  | CXCL11   | chemokine (C-X-C motif) ligand 11                                                            |

|        |           |                                                                                                            |
|--------|-----------|------------------------------------------------------------------------------------------------------------|
| 56033  | BARX1     | BarH-like homeobox 1                                                                                       |
| 1081   | CGA       | glycoprotein hormones, alpha polypeptide                                                                   |
| 10267  | RAMP1     | receptor (G protein-coupled) activity modifying protein 1                                                  |
| 51617  | HMP19     | HMP19 protein                                                                                              |
| 55789  | DEPDC1B   | DEP domain containing 1B                                                                                   |
| 8835   | SOCS2     | suppressor of cytokine signaling 2                                                                         |
| 57111  | RAB25     | RAB25, member RAS oncogene family                                                                          |
| 27040  | LAT       | linker for activation of T cells                                                                           |
| 5008   | OSM       | oncostatin M                                                                                               |
| 10549  | PRDX4     | peroxiredoxin 4                                                                                            |
| 5571   | PRKAG1    | protein kinase, AMP-activated, gamma 1 non-catalytic subunit                                               |
| 6271   | S100A1    | S100 calcium binding protein A1                                                                            |
| 55851  | PSENEN    | presenilin enhancer 2 homolog (C. elegans)                                                                 |
| 1978   | EIF4EBP1  | eukaryotic translation initiation factor 4E binding protein 1                                              |
| 3925   | STMN1     | stathmin 1/oncoprotein 18                                                                                  |
| 29100  | HSPC171   | HSPC171 protein                                                                                            |
| 51237  | MGC29506  | hypothetical protein MGC29506                                                                              |
| 6717   | SRI       | sorcin                                                                                                     |
| 8601   | RGS20     | regulator of G-protein signalling 20                                                                       |
| 9982   | FGFBP1    | fibroblast growth factor binding protein 1                                                                 |
| 10602  | CDC42EP3  | CDC42 effector protein (Rho GTPase binding) 3                                                              |
| 6503   | SLA       | Src-like-adaptor                                                                                           |
| 9454   | HOMER3    | homer homolog 3 (Drosophila)                                                                               |
| 3159   | HMGA1     | high mobility group AT-hook 1                                                                              |
| 27242  | TNFRSF21  | tumor necrosis factor receptor superfamily, member 21                                                      |
| 5612   | PRKRIR    | protein-kinase, interferon-inducible double stranded RNA dependent inhibitor, repressor of (P58 repressor) |
| 399    | RHOH      | ras homolog gene family, member H                                                                          |
| 494150 | LOC494150 | prohibitin pseudogene                                                                                      |
| 1443   | CSH2      | chorionic somatomammotropin hormone 2                                                                      |
| 975    | CD81      | CD81 molecule                                                                                              |
| 2205   | FCER1A    | Fc fragment of IgE, high affinity I, receptor for; alpha polypeptide                                       |
| 3612   | IMPA1     | inositol(myo)-1(or 4)-monophosphatase 1                                                                    |
| 80318  | GKAP1     | G kinase anchoring protein 1                                                                               |
| 2252   | FGF7      | fibroblast growth factor 7 (keratinocyte growth factor)                                                    |
| 8294   | HIST1H4I  | histone cluster 1, H4i                                                                                     |
| 10681  | GNB5      | guanine nucleotide binding protein (G protein), beta 5                                                     |
| 4118   | MAL       | mal, T-cell differentiation protein                                                                        |
| 50861  | STMN3     | stathmin-like 3                                                                                            |
| 5881   | RAC3      | ras-related C3 botulinum toxin substrate 3 (rho family, small GTP binding protein Rac3)                    |
| 9367   | RAB9A     | RAB9A, member RAS oncogene family                                                                          |
| 2885   | GRB2      | growth factor receptor-bound protein 2                                                                     |
| 56937  | TMEPAI    | transmembrane, prostate androgen induced RNA                                                               |
| 3487   | IGFBP4    | insulin-like growth factor binding protein 4                                                               |
| 7416   | VDAC1     | voltage-dependent anion channel 1                                                                          |
| 6281   | S100A10   | S100 calcium binding protein A10                                                                           |
| 6282   | S100A11   | S100 calcium binding protein A11                                                                           |
| 797    | CALCB     | calcitonin-related polypeptide, beta                                                                       |
| 57708  | MIER1     | mesoderm induction early response 1 homolog (Xenopus laevis)                                               |
| 11126  | CD160     | CD160 molecule                                                                                             |
| 581    | BAX       | BCL2-associated X protein                                                                                  |
| 22926  | ATF6      | activating transcription factor 6                                                                          |
| 81609  | SNX27     | sorting nexin family member 27                                                                             |
| 2596   | GAP43     | growth associated protein 43                                                                               |
| 3001   | GZMA      | granzyme A (granzyme 1, cytotoxic T-lymphocyte-associated serine esterase 3)                               |
| 23564  | DDAH2     | dimethylarginine dimethylaminohydrolase 2                                                                  |
| 6300   | MAPK12    | mitogen-activated protein kinase 12                                                                        |
| 9047   | SH2D2A    | SH2 domain protein 2A                                                                                      |
| 4089   | SMAD4     | SMAD family member 4                                                                                       |
| 57658  | CALCOCO1  | calcium binding and coiled-coil domain 1                                                                   |
| 55250  | STATIP1   | signal transducer and activator of transcription 3 interacting protein 1                                   |
| 399979 | SNX19     | sorting nexin 19                                                                                           |
| 5925   | RB1       | retinoblastoma 1 (including osteosarcoma)                                                                  |
| 5583   | PRKCH     | protein kinase C, eta                                                                                      |
| 5995   | RGR       | retinal G protein coupled receptor                                                                         |
| 1390   | CREM      | cAMP responsive element modulator                                                                          |
| 125058 | TBC1D16   | TBC1 domain family, member 16                                                                              |
| 919    | CD247     | CD247 molecule                                                                                             |
| 3561   | IL2RG     | interleukin 2 receptor, gamma (severe combined immunodeficiency)                                           |
| 115677 | NOSTRIN   | nitric oxide synthase trafficker                                                                           |
| 59349  | KLHL12    | kelch-like 12 (Drosophila)                                                                                 |
| 9289   | GPR56     | G protein-coupled receptor 56                                                                              |
| 9874   | TLK1      | tousled-like kinase 1                                                                                      |
| 2242   | FES       | feline sarcoma oncogene                                                                                    |
| 10392  | NOD1      | nucleotide-binding oligomerization domain containing 1                                                     |
| 2793   | GNGT2     | guanine nucleotide binding protein (G protein), gamma transducing activity polypeptide 2                   |

|        |          |                                                                                                                                                    |
|--------|----------|----------------------------------------------------------------------------------------------------------------------------------------------------|
| 51022  | GLRX2    | glutaredoxin 2                                                                                                                                     |
| 1382   | CRABP2   | cellular retinoic acid binding protein 2                                                                                                           |
| 805    | CALM2    | calmodulin 2 (phosphorylase kinase, delta)                                                                                                         |
| 5367   | PMCH     | pro-melanin-concentrating hormone                                                                                                                  |
| 9262   | STK17B   | serine/threonine kinase 17b (apoptosis-inducing)                                                                                                   |
| 26086  | GPSM1    | G-protein signalling modulator 1 (AGS3-like, <i>C. elegans</i> )                                                                                   |
| 3959   | LGALS3BP | lectin, galactoside-binding, soluble, 3 binding protein                                                                                            |
| 25791  | NGEF     | neuronal guanine nucleotide exchange factor                                                                                                        |
| 6774   | STAT3    | signal transducer and activator of transcription 3 (acute-phase response factor)                                                                   |
| 22899  | ARHGEF15 | Rho guanine nucleotide exchange factor (GEF) 15                                                                                                    |
| 9510   | ADAMTS1  | ADAM metalloproteinase with thrombospondin type 1 motif, 1                                                                                         |
| 974    | CD79B    | CD79b molecule, immunoglobulin-associated beta                                                                                                     |
| 8519   | IFITM1   | interferon induced transmembrane protein 1 (9-27)                                                                                                  |
| 29097  | CNIH4    | cornichon homolog 4 ( <i>Drosophila</i> )                                                                                                          |
| 29108  | PYCARD   | PYD and CARD domain containing                                                                                                                     |
| 572    | BAD      | BCL2-antagonist of cell death                                                                                                                      |
| 5029   | P2RY2    | purinergic receptor P2Y, G-protein coupled, 2                                                                                                      |
| 79816  | TLE6     | transducin-like enhancer of split 6 (E(sp1) homolog, <i>Drosophila</i> )                                                                           |
| 5590   | PRKCZ    | protein kinase C, zeta                                                                                                                             |
| 6772   | STAT1    | signal transducer and activator of transcription 1, 91kDa                                                                                          |
| 3689   | ITGB2    | integrin, beta 2 (complement component 3 receptor 3 and 4 subunit)                                                                                 |
| 9568   | GABBR2   | gamma-aminobutyric acid (GABA) B receptor, 2                                                                                                       |
| 868    | CBLB     | Cas-Br-M (murine) ecotropic retroviral transforming sequence b                                                                                     |
| 6367   | CCL22    | chemokine (C-C motif) ligand 22                                                                                                                    |
| 6863   | TAC1     | tachykinin, precursor 1 (substance K, substance P, neurokinin 1, neurokinin 2, neuromedin L, neurokinin alpha, neuropeptide K, neuropeptide gamma) |
| 4259   | MGST3    | microsomal glutathione S-transferase 3                                                                                                             |
| 8153   | RND2     | Rho family GTPase 2                                                                                                                                |
| 8856   | NR1I2    | nuclear receptor subfamily 1, group I, member 2                                                                                                    |
| 64840  | PORCN    | porcupine homolog ( <i>Drosophila</i> )                                                                                                            |
| 369    | ARAF     | v-ras murine sarcoma 3611 viral oncogene homolog                                                                                                   |
| 1857   | DVL3     | dishevelled, dsh homolog 3 ( <i>Drosophila</i> )                                                                                                   |
| 84249  | PSD2     | pleckstrin and Sec7 domain containing 2                                                                                                            |
| 27032  | ATP2C1   | ATPase, Ca <sup>++</sup> transporting, type 2C, member 1                                                                                           |
| 23228  | PLCL2    | phospholipase C-like 2                                                                                                                             |
| 6357   | CCL13    | chemokine (C-C motif) ligand 13                                                                                                                    |
| 10581  | IFITM2   | interferon induced transmembrane protein 2 (1-8D)                                                                                                  |
| 7164   | TPD52L1  | tumor protein D52-like 1                                                                                                                           |
| 3397   | ID1      | inhibitor of DNA binding 1, dominant negative helix-loop-helix protein                                                                             |
| 5502   | PPP1R1A  | protein phosphatase 1, regulatory (inhibitor) subunit 1A                                                                                           |
| 1901   | EDG1     | endothelial differentiation, sphingolipid G-protein-coupled receptor, 1                                                                            |
| 9618   | TRAF4    | TNF receptor-associated factor 4                                                                                                                   |
| 79735  | TBC1D17  | TBC1 domain family, member 17                                                                                                                      |
| 90134  | KCNH7    | potassium voltage-gated channel, subfamily H (eag-related), member 7                                                                               |
| 5863   | RGL2     | ral guanine nucleotide dissociation stimulator-like 2                                                                                              |
| 57231  | SNX14    | sorting nexin 14                                                                                                                                   |
| 23550  | PSD4     | pleckstrin and Sec7 domain containing 4                                                                                                            |
| 2280   | FKBP1A   | FK506 binding protein 1A, 12kDa                                                                                                                    |
| 10410  | IFITM3   | interferon induced transmembrane protein 3 (1-8U)                                                                                                  |
| 9019   | MPZL1    | myelin protein zero-like 1                                                                                                                         |
| 2872   | MKNK2    | MAP kinase interacting serine/threonine kinase 2                                                                                                   |
| 8740   | TNFSF14  | tumor necrosis factor (ligand) superfamily, member 14                                                                                              |
| 5527   | PPP2R5C  | protein phosphatase 2, regulatory subunit B', gamma isoform                                                                                        |
| 91     | ACVR1B   | activin A receptor, type IB                                                                                                                        |
| 79902  | NUP85    | nucleoporin 85kDa                                                                                                                                  |
| 2131   | EXT1     | exostoses (multiple) 1                                                                                                                             |
| 6776   | STAT5A   | signal transducer and activator of transcription 5A                                                                                                |
| 10902  | BRD8     | bromodomain containing 8                                                                                                                           |
| 5921   | RASA1    | RAS p21 protein activator (GTPase activating protein) 1                                                                                            |
| 414927 | MGC34796 | SPR pseudogene                                                                                                                                     |
| 10815  | CPLX1    | complexin 1                                                                                                                                        |
| 23589  | CARHSP1  | calcium regulated heat stable protein 1, 24kDa                                                                                                     |
| 10912  | GADD45G  | growth arrest and DNA-damage-inducible, gamma                                                                                                      |
| 9404   | LPXN     | leupaxin                                                                                                                                           |
| 8883   | APPBP1   | amyloid beta precursor protein binding protein 1                                                                                                   |
| 10432  | RBM14    | RNA binding motif protein 14                                                                                                                       |
| 64333  | ARHGAP9  | Rho GTPase activating protein 9                                                                                                                    |
| 11108  | PRDM4    | PR domain containing 4                                                                                                                             |
| 11059  | WWP1     | WW domain containing E3 ubiquitin protein ligase 1                                                                                                 |
| 3678   | ITGA5    | integrin, alpha 5 (fibronectin receptor, alpha polypeptide)                                                                                        |
| 51738  | GHRL     | ghrelin/obestatin preprohormone                                                                                                                    |
| 3956   | LGALS1   | lectin, galactoside-binding, soluble, 1 (galectin 1)                                                                                               |
| 23568  | ARL2BP   | ADP-ribosylation factor-like 2 binding protein                                                                                                     |
| 857    | CAV1     | caveolin 1, caveolae protein, 22kDa                                                                                                                |
| 5870   | RAB6A    | RAB6A, member RAS oncogene family                                                                                                                  |
| 51523  | CXXC5    | CXXC finger 5                                                                                                                                      |

|        |          |                                                                                          |
|--------|----------|------------------------------------------------------------------------------------------|
| 5179   | PENK     | proenkephalin                                                                            |
| 1776   | DNASE1L3 | deoxyribonuclease I-like 3                                                               |
| 53340  | SPA17    | sperm autoantigenic protein 17                                                           |
| 355    | FAS      | Fas (TNF receptor superfamily, member 6)                                                 |
| 5341   | PLEK     | pleckstrin                                                                               |
| 9052   | GPRC5A   | G protein-coupled receptor, family C, group 5, member A                                  |
| 2555   | GABRA2   | gamma-aminobutyric acid (GABA) A receptor, alpha 2                                       |
| 1848   | DUSP6    | dual specificity phosphatase 6                                                           |
| 9265   | PSCD3    | pleckstrin homology, Sec7 and coiled-coil domains 3                                      |
| 6252   | RTN1     | reticulon 1                                                                              |
| 3148   | HMGB2    | high-mobility group box 2                                                                |
| 9982   | FGFBP1   | fibroblast growth factor binding protein 1                                               |
| 433    | ASGR2    | asialoglycoprotein receptor 2                                                            |
| 55784  | MCTP2    | multiple C2 domains, transmembrane 2                                                     |
| 2487   | FRZB     | frizzled-related protein                                                                 |
| 10800  | CYSLTR1  | cysteinyl leukotriene receptor 1                                                         |
| 3577   | IL8RA    | interleukin 8 receptor, alpha                                                            |
| 23543  | RBM9     | RNA binding motif protein 9                                                              |
| 8861   | LDB1     | LIM domain binding 1                                                                     |
| 9649   | RALGPS1  | Ral GEF with PH domain and SH3 binding motif 1                                           |
| 3481   | IGF2     | insulin-like growth factor 2 (somatomedin A)                                             |
| 5957   | RCVRN    | recoverin                                                                                |
| 9554   | SEC22B   | SEC22 vesicle trafficking protein homolog B ( <i>S. cerevisiae</i> )                     |
| 3692   | ITGB4BP  | integrin beta 4 binding protein                                                          |
| 58533  | SNX6     | sorting nexin 6                                                                          |
| 53944  | CSNK1G1  | casein kinase 1, gamma 1                                                                 |
| 55701  | FLJ10357 | hypothetical protein FLJ10357                                                            |
| 9934   | P2RY14   | purinergic receptor P2Y, G-protein coupled, 14                                           |
| 79594  | C1orf166 | chromosome 1 open reading frame 166                                                      |
| 185    | AGTR1    | angiotensin II receptor, type 1                                                          |
| 2852   | GPR30    | G protein-coupled receptor 30                                                            |
| 5025   | P2RX4    | purinergic receptor P2X, ligand-gated ion channel, 4                                     |
| 11333  | PDAP1    | PDGFA associated protein 1                                                               |
| 10124  | ARL4A    | ADP-ribosylation factor-like 4A                                                          |
| 1442   | CSH1     | chorionic somatomammotropin hormone 1 (placental lactogen)                               |
| 3002   | GZMB     | granzyme B (granzyme 2, cytotoxic T-lymphocyte-associated serine esterase 1)             |
| 91419  | XRCC6BP1 | XRCC6 binding protein 1                                                                  |
| 5366   | PMAIP1   | phorbol-12-myristate-13-acetate-induced protein 1                                        |
| 5031   | P2RY6    | pyrimidinergic receptor P2Y, G-protein coupled, 6                                        |
| 2840   | GPR17    | G protein-coupled receptor 17                                                            |
| 5771   | PTPN2    | protein tyrosine phosphatase, non-receptor type 2                                        |
| 8935   | SKAP2    | src kinase associated phosphoprotein 2                                                   |
| 5272   | SERPINB9 | serpin peptidase inhibitor, clade B (ovalbumin), member 9                                |
| 79822  | ARHGAP28 | Rho GTPase activating protein 28                                                         |
| 27065  | D4S234E  | DNA segment on chromosome 4 (unique) 234 expressed sequence                              |
| 379    | ARL4D    | ADP-ribosylation factor-like 4D                                                          |
| 5874   | RAB27B   | RAB27B, member RAS oncogene family                                                       |
| 79139  | DERL1    | Der1-like domain family, member 1                                                        |
| 4869   | NPM1     | nucleophosmin (nucleolar phosphoprotein B23, numatrin)                                   |
| 8613   | PPAP2B   | phosphatidic acid phosphatase type 2B                                                    |
| 2246   | FGF1     | fibroblast growth factor 1 (acidic)                                                      |
| 54518  | APBB1IP  | amyloid beta (A4) precursor protein-binding, family B, member 1 interacting protein      |
| 2780   | GNAT2    | guanine nucleotide binding protein (G protein), alpha transducing activity polypeptide 2 |
| 57007  | CXCR7    | chemokine (C-X-C motif) receptor 7                                                       |
| 55785  | FGD6     | FYVE, RhoGEF and PH domain containing 6                                                  |
| 11228  | RASSF8   | Ras association (RalGDS/AF-6) domain family 8                                            |
| 11020  | RABL4    | RAB, member of RAS oncogene family-like 4                                                |
| 5861   | RAB1A    | RAB1A, member RAS oncogene family                                                        |
| 51510  | CHMP5    | chromatin modifying protein 5                                                            |
| 114609 | TIRAP    | toll-interleukin 1 receptor (TIR) domain containing adaptor protein                      |
| 4869   | NPM1     | nucleophosmin (nucleolar phosphoprotein B23, numatrin)                                   |
| 10253  | SPRY2    | sprouty homolog 2 ( <i>Drosophila</i> )                                                  |
| 10174  | SORBS3   | sorbin and SH3 domain containing 3                                                       |
| 9455   | HOMER2   | homer homolog 2 ( <i>Drosophila</i> )                                                    |
| 2781   | GNAZ     | guanine nucleotide binding protein (G protein), alpha z polypeptide                      |
| 945    | CD33     | CD33 molecule                                                                            |
| 8863   | PER3     | period homolog 3 ( <i>Drosophila</i> )                                                   |
| 55003  | PAK1IP1  | PAK1 interacting protein 1                                                               |
| 5998   | RGS3     | regulator of G-protein signalling 3                                                      |
| 1942   | EFNA1    | ephrin-A1                                                                                |
| 51510  | CHMP5    | chromatin modifying protein 5                                                            |
| 5111   | PCNA     | proliferating cell nuclear antigen                                                       |
| 26228  | BRDG1    | BCR downstream signaling 1                                                               |
| 27063  | ANKRD1   | ankyrin repeat domain 1 (cardiac muscle)                                                 |
| 5745   | PTHr1    | parathyroid hormone receptor 1                                                           |
| 51562  | MBIP     | MAP3K12 binding inhibitory protein 1                                                     |

|        |          |                                                                                            |
|--------|----------|--------------------------------------------------------------------------------------------|
| 23770  | FKBP8    | FK506 binding protein 8, 38kDa                                                             |
| 1819   | DRG2     | developmentally regulated GTP binding protein 2                                            |
| 11197  | WIF1     | WNT inhibitory factor 1                                                                    |
| 387    | RHOA     | ras homolog gene family, member A                                                          |
| 5999   | RGS4     | regulator of G-protein signalling 4                                                        |
| 79039  | DDX54    | DEAD (Asp-Glu-Ala-Asp) box polypeptide 54                                                  |
| 3123   | HLA-DRB1 | major histocompatibility complex, class II, DR beta 1                                      |
| 378925 | RNF148   | ring finger protein 148                                                                    |
| 2100   | ESR2     | estrogen receptor 2 (ER beta)                                                              |
| 219790 | PLEKHK1  | pleckstrin homology domain containing, family K member 1                                   |
| 684    | BST2     | bone marrow stromal cell antigen 2                                                         |
| 8878   | SQSTM1   | sequestosome 1                                                                             |
| 5603   | MAPK13   | mitogen-activated protein kinase 13                                                        |
| 5573   | PRKAR1A  | protein kinase, cAMP-dependent, regulatory, type I, alpha (tissue specific extinguisher 1) |
| 9411   | ARHGAP29 | Rho GTPase activating protein 29                                                           |
| 8533   | COPS3    | COP9 constitutive photomorphogenic homolog subunit 3 (Arabidopsis)                         |
| 2896   | GRN      | granulin                                                                                   |
| 3190   | HNRPK    | heterogeneous nuclear ribonucleoprotein K                                                  |
| 81033  | KCNH6    | potassium voltage-gated channel, subfamily H (eag-related), member 6                       |
| 10133  | OPTN     | optineurin                                                                                 |
| 3320   | HSP90AA1 | heat shock protein 90kDa alpha (cytosolic), class A member 1                               |
| 5583   | PRKCH    | protein kinase C, eta                                                                      |
| 56882  | CDC42SE1 | CDC42 small effector 1                                                                     |
| 8367   | HIST1H4E | histone cluster 1, H4e                                                                     |
| 152015 | ROPN1B   | ropporin, rhophilin associated protein 1B                                                  |
| 23421  | ITGB3BP  | integrin beta 3 binding protein (beta3-endonexin)                                          |
| 9266   | PSCD2    | pleckstrin homology, Sec7 and coiled-coil domains 2 (cytohesin-2)                          |
| 9467   | SH3BP5   | SH3-domain binding protein 5 (BTK-associated)                                              |
| 9318   | COPS2    | COP9 constitutive photomorphogenic homolog subunit 2 (Arabidopsis)                         |
| 4354   | MPP1     | membrane protein, palmitoylated 1, 55kDa                                                   |
| 2923   | PDIA3    | protein disulfide isomerase family A, member 3                                             |
| 5518   | PPP2R1A  | protein phosphatase 2 (formerly 2A), regulatory subunit A , alpha isoform                  |
| 8829   | NRP1     | neuropilin 1                                                                               |
| 6733   | SRPK2    | SFRS protein kinase 2                                                                      |
| 56998  | CTNNBIP1 | catenin, beta interacting protein 1                                                        |
| 54205  | CYCS     | cytochrome c, somatic                                                                      |
| 1979   | EIF4EBP2 | eukaryotic translation initiation factor 4E binding protein 2                              |
| 1381   | CRABP1   | cellular retinoic acid binding protein 1                                                   |
| 8027   | STAM     | signal transducing adaptor molecule (SH3 domain and ITAM motif) 1                          |
| 1909   | EDNRA    | endothelin receptor type A                                                                 |
| 7041   | TGFB11   | transforming growth factor beta 1 induced transcript 1                                     |
| 23624  | CBLC     | Cas-Br-M (murine) ecotropic retroviral transforming sequence c                             |
| 4145   | MATK     | megakaryocyte-associated tyrosine kinase                                                   |
| 53358  | SHC3     | SHC (Src homology 2 domain containing) transforming protein 3                              |
| 3707   | ITPKB    | inositol 1,4,5-trisphosphate 3-kinase B                                                    |
| 64786  | TBC1D15  | TBC1 domain family, member 15                                                              |
| 84278  | HIATL2   | hippocampus abundant gene transcript-like 2                                                |
| 3159   | HMGA1    | high mobility group AT-hook 1                                                              |
| 4867   | NPHP1    | nephronophthisis 1 (juvenile)                                                              |
| 10597  | SEDLP    | spondyloepiphyseal dysplasia, late, pseudogene                                             |
| 2004   | ELK3     | ELK3, ETS-domain protein (SRF accessory protein 2)                                         |
| 221002 | RASGEF1A | RasGEF domain family, member 1A                                                            |
| 8227   | CXYorf3  | chromosome X and Y open reading frame 3                                                    |
| 23603  | CORO1C   | coronin, actin binding protein, 1C                                                         |
| 23061  | TBC1D9B  | TBC1 domain family, member 9B (with GRAM domain)                                           |
| 23683  | PRKD3    | protein kinase D3                                                                          |
| 9855   | FARP2    | FERM, RhoGEF and pleckstrin domain protein 2                                               |
| 9886   | RHOBTB1  | Rho-related BTB domain containing 1                                                        |
| 23085  | ERC1     | ELKS/RAB6-interacting/CAST family member 1                                                 |
| 2920   | CXCL2    | chemokine (C-X-C motif) ligand 2                                                           |
| 112398 | EGLN2    | egl nine homolog 2 (C. elegans)                                                            |
| 4627   | MYH9     | myosin, heavy chain 9, non-muscle                                                          |
| 652    | BMP4     | bone morphogenetic protein 4                                                               |
| 55081  | IFT57    | intraflagellar transport 57 homolog (Chlamydomonas)                                        |
| 887    | CCKBR    | cholecystokinin B receptor                                                                 |
| 207    | AKT1     | v-akt murine thymoma viral oncogene homolog 1                                              |
| 8532   | CPZ      | carboxypeptidase Z                                                                         |
| 8031   | NCOA4    | nuclear receptor coactivator 4                                                             |
| 1936   | EEF1D    | eukaryotic translation elongation factor 1 delta (guanine nucleotide exchange protein)     |
| 84986  | ARHGAP19 | Rho GTPase activating protein 19                                                           |
| 6373   | CXCL11   | chemokine (C-X-C motif) ligand 11                                                          |
| 801    | CALM1    | calmodulin 1 (phosphorylase kinase, delta)                                                 |
| 5802   | PTPRS    | protein tyrosine phosphatase, receptor type, S                                             |
| 51079  | NDUFA13  | NADH dehydrogenase (ubiquinone) 1 alpha subcomplex, 13                                     |
| 4286   | MITF     | microphthalmia-associated transcription factor                                             |
| 28988  | DBNL     | drebrin-like                                                                               |

|        |          |                                                                                                                     |
|--------|----------|---------------------------------------------------------------------------------------------------------------------|
| 835    | CASP2    | caspase 2, apoptosis-related cysteine peptidase (neural precursor cell expressed, developmentally down-regulated 2) |
| 1136   | CHRNA3   | cholinergic receptor, nicotinic, alpha 3                                                                            |
| 7464   | CORO2A   | coronin, actin binding protein, 2A                                                                                  |
| 7857   | SCG2     | secretogranin II (chromogranin C)                                                                                   |
| 9984   | THOC1    | THO complex 1                                                                                                       |
| 2790   | GNG10    | guanine nucleotide binding protein (G protein), gamma 10                                                            |
| 6363   | CCL19    | chemokine (C-C motif) ligand 19                                                                                     |
| 6372   | CXCL6    | chemokine (C-X-C motif) ligand 6 (granulocyte chemotactic protein 2)                                                |
| 966    | CD59     | CD59 molecule, complement regulatory protein                                                                        |
| 2922   | GRP      | gastrin-releasing peptide                                                                                           |
| 8517   | IKBKG    | inhibitor of kappa light polypeptide gene enhancer in B-cells, kinase gamma                                         |
| 3275   | PRMT2    | protein arginine methyltransferase 2                                                                                |
| 51463  | GPR89A   | G protein-coupled receptor 89A                                                                                      |
| 3459   | IFNGR1   | interferon gamma receptor 1                                                                                         |
| 2886   | GRB7     | growth factor receptor-bound protein 7                                                                              |
| 113878 | DTX2     | deltex homolog 2 (Drosophila)                                                                                       |
| 5519   | PPP2R1B  | protein phosphatase 2 (formerly 2A), regulatory subunit A, beta isoform                                             |
| 2786   | GNG4     | guanine nucleotide binding protein (G protein), gamma 4                                                             |
| 27130  | INVS     | inversin                                                                                                            |
| 6374   | CXCL5    | chemokine (C-X-C motif) ligand 5                                                                                    |
| 6366   | CCL21    | chemokine (C-C motif) ligand 21                                                                                     |
| 55750  | AGK      | acylglycerol kinase                                                                                                 |
| 57126  | CD177    | CD177 molecule                                                                                                      |
| 5979   | RET      | ret proto-oncogene (multiple endocrine neoplasia and medullary thyroid carcinoma 1, Hirschsprung disease)           |
| 7535   | ZAP70    | zeta-chain (TCR) associated protein kinase 70kDa                                                                    |
| 9252   | RPS6KA5  | ribosomal protein S6 kinase, 90kDa, polypeptide 5                                                                   |
| 399694 | SHC4     | SHC (Src homology 2 domain containing) family, member 4                                                             |
| 5579   | PRKCB1   | protein kinase C, beta 1                                                                                            |
| 4900   | NRGN     | neurogranin (protein kinase C substrate, RC3)                                                                       |
| 121504 | HIST4H4  | histone cluster 4, H4                                                                                               |
| 10010  | TANK     | TRAF family member-associated NFKB activator                                                                        |
| 29108  | PYCARD   | PYD and CARD domain containing                                                                                      |
| 801    | CALM1    | calmodulin 1 (phosphorylase kinase, delta)                                                                          |
| 7432   | VIP      | vasoactive intestinal peptide                                                                                       |
| 6001   | RGS10    | regulator of G-protein signalling 10                                                                                |
| 8834   | TMEM11   | transmembrane protein 11                                                                                            |
| 55816  | DOK5     | docking protein 5                                                                                                   |
| 114971 | PTPMT1   | protein tyrosine phosphatase, mitochondrial 1                                                                       |
| 8817   | FGF18    | fibroblast growth factor 18                                                                                         |
| 2810   | SFN      | stratifin                                                                                                           |
| 9098   | USP6     | ubiquitin specific peptidase 6 (Tre-2 oncogene)                                                                     |
| 7105   | TSPAN6   | tetraspanin 6                                                                                                       |
| 5173   | PDYN     | prodynorphin                                                                                                        |
| 1316   | KLF6     | Kruppel-like factor 6                                                                                               |
| 808    | CALM3    | calmodulin 3 (phosphorylase kinase, delta)                                                                          |
| 5998   | RGS3     | regulator of G-protein signalling 3                                                                                 |
| 11163  | NUDT4    | nudix (nucleoside diphosphate linked moiety X)-type motif 4                                                         |
| 28512  | NKIRAS1  | NFKB inhibitor interacting Ras-like 1                                                                               |
| 8738   | CRADD    | CASP2 and RIPK1 domain containing adaptor with death domain                                                         |
| 11021  | RAB35    | RAB35, member RAS oncogene family                                                                                   |
| 26291  | FGF21    | fibroblast growth factor 21                                                                                         |
| 6014   | RIT2     | Ras-like without CAAX 2                                                                                             |
| 51715  | RAB23    | RAB23, member RAS oncogene family                                                                                   |
| 29883  | CNOT7    | CCR4-NOT transcription complex, subunit 7                                                                           |
| 7531   | YWHAE    | tyrosine 3-monooxygenase/tryptophan 5-monooxygenase activation protein, epsilon polypeptide                         |
| 84727  | SPSB2    | splA/ryanodine receptor domain and SOCS box containing 2                                                            |
| 805    | CALM2    | calmodulin 2 (phosphorylase kinase, delta)                                                                          |
| 10874  | NMU      | neuromedin U                                                                                                        |
| 92610  | TIFA     | TRAF-interacting protein with a forkhead-associated domain                                                          |
| 80117  | ARL14    | ADP-ribosylation factor-like 14                                                                                     |
| 5330   | PLCB2    | phospholipase C, beta 2                                                                                             |
| 2978   | GUCA1A   | guanylate cyclase activator 1A (retina)                                                                             |
| 23682  | RAB38    | RAB38, member RAS oncogene family                                                                                   |
| 54734  | RAB39    | RAB39, member RAS oncogene family                                                                                   |
| 9363   | RAB33A   | RAB33A, member RAS oncogene family                                                                                  |
| 8741   | TNFSF13  | tumor necrosis factor (ligand) superfamily, member 13                                                               |
| 30818  | KCNIP3   | Kv channel interacting protein 3, calsénin                                                                          |
| 51107  | APH1A    | anterior pharynx defective 1 homolog A (C. elegans)                                                                 |
| 4259   | MGST3    | microsomal glutathione S-transferase 3                                                                              |
| 340419 | RSPO2    | R-spondin 2 homolog (Xenopus laevis)                                                                                |
| 5908   | RAP1B    | RAP1B, member of RAS oncogene family                                                                                |
| 57403  | RAB22A   | RAB22A, member RAS oncogene family                                                                                  |
| 8764   | TNFRSF14 | tumor necrosis factor receptor superfamily, member 14 (herpesvirus entry mediator)                                  |
| 6004   | RGS16    | regulator of G-protein signalling 16                                                                                |



|       |          |                                                                                         |
|-------|----------|-----------------------------------------------------------------------------------------|
| 5480  | PPIC     | peptidylprolyl isomerase C (cyclophilin C)                                              |
| 1442  | CSH1     | chorionic somatomammotropin hormone 1 (placental lactogen)                              |
| 56616 | DIABLO   | diablo homolog (Drosophila)                                                             |
| 6398  | SECTM1   | secreted and transmembrane 1                                                            |
| 5567  | PRKACB   | protein kinase, cAMP-dependent, catalytic, beta                                         |
| 4869  | NPM1     | nucleophosmin (nucleolar phosphoprotein B23, numatrin)                                  |
| 9536  | PTGES    | prostaglandin E synthase                                                                |
| 1907  | EDN2     | endothelin 2                                                                            |
| 55207 | ARL8B    | ADP-ribosylation factor-like 8B                                                         |
| 637   | BID      | BH3 interacting domain death agonist                                                    |
| 9270  | ITGB1BP1 | integrin beta 1 binding protein 1                                                       |
| 5872  | RAB13    | RAB13, member RAS oncogene family                                                       |
| 5862  | RAB2A    | RAB2A, member RAS oncogene family                                                       |
| 5867  | RAB4A    | RAB4A, member RAS oncogene family                                                       |
| 3068  | HDGF     | hepatoma-derived growth factor (high-mobility group protein 1-like)                     |
| 11248 | NXPH3    | neurexophilin 3                                                                         |
| 84336 | TMEM101  | transmembrane protein 101                                                               |
| 51107 | APH1A    | anterior pharynx defective 1 homolog A (C. elegans)                                     |
| 54581 | SCAND2   | SCAN domain containing 2                                                                |
| 90390 | THRAP6   | thyroid hormone receptor associated protein 6                                           |
| 3845  | KRAS     | v-Ki-ras2 Kirsten rat sarcoma viral oncogene homolog                                    |
| 10219 | KLRG1    | killer cell lectin-like receptor subfamily G, member 1                                  |
| 10890 | RAB10    | RAB10, member RAS oncogene family                                                       |
| 1398  | CRK      | v-crk sarcoma virus CT10 oncogene homolog (avian)                                       |
| 1906  | EDN1     | endothelin 1                                                                            |
| 5156  | PDGFRA   | platelet-derived growth factor receptor, alpha polypeptide                              |
| 9218  | VAPA     | VAMP (vesicle-associated membrane protein)-associated protein A, 33kDa                  |
| 51118 | UTP11L   | UTP11-like, U3 small nucleolar ribonucleoprotein, (yeast)                               |
| 23176 | 8/sep    | septin 8                                                                                |
| 3123  | HLA-DRB1 | major histocompatibility complex, class II, DR beta 1                                   |
| 93659 | CGB5     | chorionic gonadotropin, beta polypeptide 5                                              |
| 11065 | UBE2C    | ubiquitin-conjugating enzyme E2C                                                        |
| 11315 | PARK7    | Parkinson disease (autosomal recessive, early onset) 7                                  |
| 637   | BID      | BH3 interacting domain death agonist                                                    |
| 22859 | LPHN1    | latrophilin 1                                                                           |
| 396   | ARHGDI2  | Rho GDP dissociation inhibitor (GDI) alpha                                              |
| 3569  | IL6      | interleukin 6 (interferon, beta 2)                                                      |
| 5864  | RAB3A    | RAB3A, member RAS oncogene family                                                       |
| 7462  | LAT2     | linker for activation of T cells family, member 2                                       |
| 7253  | TSHR     | thyroid stimulating hormone receptor                                                    |
| 79363 | C1orf89  | chromosome 1 open reading frame 89                                                      |
| 1072  | CFL1     | cofilin 1 (non-muscle)                                                                  |
| 378   | ARF4     | ADP-ribosylation factor 4                                                               |
| 998   | CDC42    | cell division cycle 42 (GTP binding protein, 25kDa)                                     |
| 3148  | HMGB2    | high-mobility group box 2                                                               |
| 64781 | CERK     | ceramide kinase                                                                         |
| 22931 | RAB18    | RAB18, member RAS oncogene family                                                       |
| 2339  | FNTA     | farnesyltransferase, CAAX box, alpha                                                    |
| 80762 | NDFIP1   | Nedd4 family interacting protein 1                                                      |
| 390   | RND3     | Rho family GTPase 3                                                                     |
| 1149  | CIDEA    | cell death-inducing DFFA-like effector a                                                |
| 939   | CD27     | CD27 molecule                                                                           |
| 22943 | DKK1     | dickkopf homolog 1 (Xenopus laevis)                                                     |
| 63898 | SH2D4A   | SH2 domain containing 4A                                                                |
| 958   | CD40     | CD40 molecule, TNF receptor superfamily member 5                                        |
| 9200  | PTPLA    | protein tyrosine phosphatase-like (proline instead of catalytic arginine), member A     |
| 5995  | RGR      | retinal G protein coupled receptor                                                      |
| 5082  | PDCL     | phosducin-like                                                                          |
| 961   | CD47     | CD47 molecule                                                                           |
| 2213  | FCGR2B   | Fc fragment of IgG, low affinity IIb, receptor (CD32)                                   |
| 3705  | ITPK1    | inositol 1,3,4-triphosphate 5/6 kinase                                                  |
| 1393  | CRHBP    | corticotropin releasing hormone binding protein                                         |
| 7538  | ZFP36    | zinc finger protein 36, C3H type, homolog (mouse)                                       |
| 3455  | IFNAR2   | interferon (alpha, beta and omega) receptor 2                                           |
| 23551 | RASD2    | RASD family, member 2                                                                   |
| 3488  | IGFBP5   | insulin-like growth factor binding protein 5                                            |
| 836   | CASP3    | caspase 3, apoptosis-related cysteine peptidase                                         |
| 27111 | SDCBP2   | syndecan binding protein (syntenin) 2                                                   |
| 3921  | RPSA     | ribosomal protein SA                                                                    |
| 2775  | GNAO1    | guanine nucleotide binding protein (G protein), alpha activating activity polypeptide O |
| 351   | APP      | amyloid beta (A4) precursor protein (peptidase nexin-II, Alzheimer disease)             |
| 11040 | PIM2     | pim-2 oncogene                                                                          |
| 9743  | RICS     | Rho GTPase-activating protein                                                           |
| 55715 | DOK4     | docking protein 4                                                                       |
| 54860 | MS4A12   | membrane-spanning 4-domains, subfamily A, member 12                                     |
| 92369 | SPSB4    | splA/ryanodine receptor domain and SOCS box containing 4                                |

|        |          |                                                                                         |
|--------|----------|-----------------------------------------------------------------------------------------|
| 10966  | RAB40B   | RAB40B, member RAS oncogene family                                                      |
| 4615   | MYD88    | myeloid differentiation primary response gene (88)                                      |
| 10273  | STUB1    | STIP1 homology and U-box containing protein 1                                           |
| 5538   | PPT1     | palmitoyl-protein thioesterase 1 (ceroid-lipofuscinosis, neuronal 1, infantile)         |
| 9255   | SCYE1    | small inducible cytokine subfamily E, member 1 (endothelial monocyte-activating)        |
| 10399  | GNB2L1   | guanine nucleotide binding protein (G protein), beta polypeptide 2-like 1               |
| 55344  | PLCXD1   | phosphatidylinositol-specific phospholipase C, X domain containing 1                    |
| 2874   | GPS2     | G protein pathway suppressor 2                                                          |
| 493861 | EID3     | EP300 interacting inhibitor of differentiation 3                                        |
| 9019   | MPZL1    | myelin protein zero-like 1                                                              |
| 80176  | SPSB1    | splA/ryanodine receptor domain and SOCS box containing 1                                |
| 81542  | TXNDC1   | thioredoxin domain containing 1                                                         |
| 896    | CCND3    | cyclin D3                                                                               |
| 3084   | NRG1     | neuregulin 1                                                                            |
| 840    | CASP7    | caspase 7, apoptosis-related cysteine peptidase                                         |
| 114780 | PKD1L2   | polycystic kidney disease 1-like 2                                                      |
| 57019  | CIAPIN1  | cytokine induced apoptosis inhibitor 1                                                  |
| 4070   | TACSTD2  | tumor-associated calcium signal transducer 2                                            |
| 10982  | MAPRE2   | microtubule-associated protein, RP/EB family, member 2                                  |
| 115330 | GPR146   | G protein-coupled receptor 146                                                          |
| 53836  | GPR87    | G protein-coupled receptor 87                                                           |
| 51277  | RBJ      | Ras-associated protein Rap1                                                             |
| 51655  | RASD1    | RAS, dexamethasone-induced 1                                                            |
| 64210  | MMS19L   | MMS19-like (MET18 homolog, <i>S. cerevisiae</i> )                                       |
| 931    | MS4A1    | membrane-spanning 4-domains, subfamily A, member 1                                      |
| 6678   | SPARC    | secreted protein, acidic, cysteine-rich (osteonectin)                                   |
| 9111   | NMI      | N-myc (and STAT) interactor                                                             |
| 2267   | FGL1     | fibrinogen-like 1                                                                       |
| 4157   | MC1R     | melanocortin 1 receptor (alpha melanocyte stimulating hormone receptor)                 |
| 5308   | PITX2    | paired-like homeodomain transcription factor 2                                          |
| 9402   | GRAP2    | GRB2-related adaptor protein 2                                                          |
| 5608   | MAP2K6   | mitogen-activated protein kinase kinase 6                                               |
| 3553   | IL1B     | interleukin 1, beta                                                                     |
| 54472  | TOLLIP   | toll interacting protein                                                                |
| 140461 | ASB8     | ankyrin repeat and SOCS box-containing 8                                                |
| 51256  | TBC1D7   | TBC1 domain family, member 7                                                            |
| 11331  | PHB2     | prohibitin 2                                                                            |
| 1019   | CDK4     | cyclin-dependent kinase 4                                                               |
| 8851   | CDK5R1   | cyclin-dependent kinase 5, regulatory subunit 1 (p35)                                   |
| 8575   | PRKRA    | protein kinase, interferon-inducible double stranded RNA dependent activator            |
| 140    | ADORA3   | adenosine A3 receptor                                                                   |
| 246329 | STAC3    | SH3 and cysteine rich domain 3                                                          |
| 151306 | GPBAR1   | G protein-coupled bile acid receptor 1                                                  |
| 9901   | SRGAP3   | SLIT-ROBO Rho GTPase activating protein 3                                               |
| 29079  | MED4     | mediator of RNA polymerase II transcription, subunit 4 homolog ( <i>S. cerevisiae</i> ) |
| 573    | BAG1     | BCL2-associated athanogene                                                              |
| 3162   | HMOX1    | heme oxygenase (decycling) 1                                                            |
| 140462 | ASB9     | ankyrin repeat and SOCS box-containing 9                                                |
| 952    | CD38     | CD38 molecule                                                                           |
| 1398   | CRK      | v-crk sarcoma virus CT10 oncogene homolog (avian)                                       |
| 8851   | CDK5R1   | cyclin-dependent kinase 5, regulatory subunit 1 (p35)                                   |
| 10783  | NEK6     | NIMA (never in mitosis gene a)-related kinase 6                                         |
| 758    | MPPED1   | metallophosphoesterase domain containing 1                                              |
| 2827   | GPR3     | G protein-coupled receptor 3                                                            |
| 5245   | PHB      | prohibitin                                                                              |
| 11130  | ZWINT    | ZW10 interactor                                                                         |
| 3613   | IMPA2    | inositol(myo)-1(or 4)-monophosphatase 2                                                 |
| 6423   | SFRP2    | secreted frizzled-related protein 2                                                     |
| 26084  | SGEF     | Src homology 3 domain-containing guanine nucleotide exchange factor                     |
| 27239  | GPR162   | G protein-coupled receptor 162                                                          |
| 51324  | SPG21    | spastic paraplegia 21, maspardin (autosomal recessive, Mast syndrome)                   |
| 10670  | RRAGA    | Ras-related GTP binding A                                                               |
| 308    | ANXA5    | annexin A5                                                                              |
| 134    | ADORA1   | adenosine A1 receptor                                                                   |
| 2841   | GPR18    | G protein-coupled receptor 18                                                           |
| 51665  | ASB1     | ankyrin repeat and SOCS box-containing 1                                                |
| 1385   | CREB1    | cAMP responsive element binding protein 1                                               |
| 56288  | PARD3    | par-3 partitioning defective 3 homolog ( <i>C. elegans</i> )                            |
| 11070  | TMEM115  | transmembrane protein 115                                                               |
| 1641   | DCX      | doublecortex; lissencephaly, X-linked (doublecortin)                                    |
| 3623   | INH1A    | inhibin, alpha                                                                          |
| 1271   | CNTFR    | ciliary neurotrophic factor receptor                                                    |
| 10672  | GNA13    | guanine nucleotide binding protein (G protein), alpha 13                                |
| 7867   | MAPKAPK3 | mitogen-activated protein kinase-activated protein kinase 3                             |
| 4660   | PPP1R12B | protein phosphatase 1, regulatory (inhibitor) subunit 12B                               |
| 148022 | TICAM1   | toll-like receptor adaptor molecule 1                                                   |

|        |          |                                                                                         |
|--------|----------|-----------------------------------------------------------------------------------------|
| 51704  | GPRC5B   | G protein-coupled receptor, family C, group 5, member B                                 |
| 5329   | PLAUR    | plasminogen activator, urokinase receptor                                               |
| 10663  | CXCR6    | chemokine (C-X-C motif) receptor 6                                                      |
| 158947 | ARMCX4   | armadillo repeat containing, X-linked 4                                                 |
| 914    | CD2      | CD2 molecule                                                                            |
| 7472   | WNT2     | wingless-type MMTV integration site family member 2                                     |
| 6455   | SH3GL1   | SH3-domain GRB2-like 1                                                                  |
| 11033  | CENTA1   | centaurin, alpha 1                                                                      |
| 3352   | HTR1D    | 5-hydroxytryptamine (serotonin) receptor 1D                                             |
| 60485  | SAV1     | salvador homolog 1 (Drosophila)                                                         |
| 157    | ADRBK2   | adrenergic, beta, receptor kinase 2                                                     |
| 5589   | PRKCSH   | protein kinase C substrate 80K-H                                                        |
| 11318  | ADMR     | adrenomedullin receptor                                                                 |
| 122011 | CSNK1A1L | casein kinase 1, alpha 1-like                                                           |
| 10140  | TOB1     | transducer of ERBB2, 1                                                                  |
| 6879   | TAF7     | TAF7 RNA polymerase II, TATA box binding protein (TBP)-associated factor, 55kDa         |
| 7852   | CXCR4    | chemokine (C-X-C motif) receptor 4                                                      |
| 3579   | IL8RB    | interleukin 8 receptor, beta                                                            |
| 2833   | CXCR3    | chemokine (C-X-C motif) receptor 3                                                      |
| 2209   | FCGR1A   | Fc fragment of IgG, high affinity Ia, receptor (CD64)                                   |
| 4690   | NCK1     | NCK adaptor protein 1                                                                   |
| 9577   | BRE      | brain and reproductive organ-expressed (TNFRSF1A modulator)                             |
| 7040   | TGFB1    | transforming growth factor, beta 1 (Camurati-Engelmann disease)                         |
| 53637  | EDG8     | endothelial differentiation, sphingolipid G-protein-coupled receptor, 8                 |
| 55884  | WSB2     | WD repeat and SOCS box-containing 2                                                     |
| 23493  | HEY2     | hairly/enhancer-of-split related with YRPW motif 2                                      |
| 1022   | CDK7     | cyclin-dependent kinase 7 (MO15 homolog, Xenopus laevis, cdk-activating kinase)         |
| 7476   | WNT7A    | wingless-type MMTV integration site family, member 7A                                   |
| 623    | BDKRB1   | bradykinin receptor B1                                                                  |
| 5467   | PPARD    | peroxisome proliferator-activated receptor delta                                        |
| 6752   | SSTR2    | somatostatin receptor 2                                                                 |
| 1235   | CCR6     | chemokine (C-C motif) receptor 6                                                        |
| 187    | AGTRL1   | angiotensin II receptor-like 1                                                          |
| 23620  | NTSR2    | neurotensin receptor 2                                                                  |
| 64121  | RRAGC    | Ras-related GTP binding C                                                               |
| 10900  | RPIP8    | RaP2 interacting protein 8                                                              |
| 93594  | WDR67    | WD repeat domain 67                                                                     |
| 301    | ANXA1    | annexin A1                                                                              |
| 27122  | DKK3     | dickkopf homolog 3 (Xenopus laevis)                                                     |
| 2898   | GRIK2    | glutamate receptor, ionotropic, kainate 2                                               |
| 5984   | RFC4     | replication factor C (activator 1) 4, 37kDa                                             |
| 11191  | PTENP1   | phosphatase and tensin homolog (mutated in multiple advanced cancers 1), pseudogene 1   |
| 11321  | XAB1     | XPA binding protein 1, GTPase                                                           |
| 1848   | DUSP6    | dual specificity phosphatase 6                                                          |
| 1238   | CCBP2    | chemokine binding protein 2                                                             |
| 6751   | SSTR1    | somatostatin receptor 1                                                                 |
| 10314  | LANCL1   | LanC lantibiotic synthetase component C-like 1 (bacterial)                              |
| 64798  | DEPDC6   | DEP domain containing 6                                                                 |
| 2783   | GNB2     | guanine nucleotide binding protein (G protein), beta polypeptide 2                      |
| 10218  | ANGPTL7  | angiotensin-like 7                                                                      |
| 5567   | PRKACB   | protein kinase, cAMP-dependent, catalytic, beta                                         |
| 2770   | GNAI1    | guanine nucleotide binding protein (G protein), alpha inhibiting activity polypeptide 1 |
| 1902   | EDG2     | endothelial differentiation, lysophosphatidic acid G-protein-coupled receptor, 2        |
| 4987   | OPRL1    | opiate receptor-like 1                                                                  |
| 7913   | DEK      | DEK oncogene (DNA binding)                                                              |
| 2697   | GJA1     | gap junction protein, alpha 1, 43kDa                                                    |
| 4886   | NPY1R    | neuropeptide Y receptor Y1                                                              |
| 7157   | TP53     | tumor protein p53 (Li-Fraumeni syndrome)                                                |
| 9265   | PSCD3    | pleckstrin homology, Sec7 and coiled-coil domains 3                                     |
| 64798  | DEPDC6   | DEP domain containing 6                                                                 |
| 59345  | GNB4     | guanine nucleotide binding protein (G protein), beta polypeptide 4                      |
| 1022   | CDK7     | cyclin-dependent kinase 7 (MO15 homolog, Xenopus laevis, cdk-activating kinase)         |
| 9170   | EDG4     | endothelial differentiation, lysophosphatidic acid G-protein-coupled receptor, 4        |
| 1524   | CX3CR1   | chemokine (C-X3-C motif) receptor 1                                                     |
| 5600   | MAPK11   | mitogen-activated protein kinase 11                                                     |
| 54329  | GPR85    | G protein-coupled receptor 85                                                           |
| 2331   | FMOD     | fibromodulin                                                                            |
| 5494   | PPM1A    | protein phosphatase 1A (formerly 2C), magnesium-dependent, alpha isoform                |
| 11135  | CDC42EP1 | CDC42 effector protein (Rho GTPase binding) 1                                           |
| 1846   | DUSP4    | dual specificity phosphatase 4                                                          |
| 10332  | CLEC4M   | C-type lectin domain family 4, member M                                                 |
| 2782   | GNB1     | guanine nucleotide binding protein (G protein), beta polypeptide 1                      |
| 5606   | MAP2K3   | mitogen-activated protein kinase kinase 3                                               |
| 2358   | FPRL1    | formyl peptide receptor-like 1                                                          |
| 407    | ARR3     | arrestin 3, retinal (X-arrestin)                                                        |
| 7044   | LEFTY2   | left-right determination factor 2                                                       |

|        |           |                                                                                   |
|--------|-----------|-----------------------------------------------------------------------------------|
| 92999  | ZBTB47    | zinc finger and BTB domain containing 47                                          |
| 5029   | P2RY2     | purinergic receptor P2Y, G-protein coupled, 2                                     |
| 5576   | PRKAR2A   | protein kinase, cAMP-dependent, regulatory, type II, alpha                        |
| 8877   | SPHK1     | sphingosine kinase 1                                                              |
| 2150   | F2RL1     | coagulation factor II (thrombin) receptor-like 1                                  |
| 23596  | OPN3      | opsin 3 (encephalopsin, panopsin)                                                 |
| 168417 | ZNF679    | zinc finger protein 679                                                           |
| 1454   | CSNK1E    | casein kinase 1, epsilon                                                          |
| 5609   | MAP2K7    | mitogen-activated protein kinase kinase 7                                         |
| 28988  | DBNL      | drebrin-like                                                                      |
| 8795   | TNFRSF10B | tumor necrosis factor receptor superfamily, member 10b                            |
| 5607   | MAP2K5    | mitogen-activated protein kinase kinase 5                                         |
| 1123   | CHN1      | chimerin (chimaerin) 1                                                            |
| 10146  | G3BP1     | GTPase activating protein (SH3 domain) binding protein 1                          |
| 814    | CAMK4     | calcium/calmodulin-dependent protein kinase IV                                    |
| 9093   | DNAJA3    | DnaJ (Hsp40) homolog, subfamily A, member 3                                       |
| 23452  | ANGPTL2   | angiopoietin-like 2                                                               |
| 135    | ADORA2A   | adenosine A2a receptor                                                            |
| 51466  | EVL       | Enah/Vasp-like                                                                    |
| 10298  | PAK4      | p21(CDKN1A)-activated kinase 4                                                    |
| 5770   | PTPN1     | protein tyrosine phosphatase, non-receptor type 1                                 |
| 55890  | GPRC5C    | G protein-coupled receptor, family C, group 5, member C                           |
| 5664   | PSEN2     | presenilin 2 (Alzheimer disease 4)                                                |
| 8882   | ZNF259    | zinc finger protein 259                                                           |
| 5914   | RARA      | retinoic acid receptor, alpha                                                     |
| 8797   | TNFRSF10A | tumor necrosis factor receptor superfamily, member 10a                            |
| 115557 | GEFT      | RAC/CDC42 exchange factor                                                         |
| 1890   | ECGF1     | endothelial cell growth factor 1 (platelet-derived)                               |
| 8973   | CHRNA6    | cholinergic receptor, nicotinic, alpha 6                                          |
| 9046   | DOK2      | docking protein 2, 56kDa                                                          |
| 408    | ARRB1     | arrestin, beta 1                                                                  |
| 10494  | STK25     | serine/threonine kinase 25 (STE20 homolog, yeast)                                 |
| 5163   | PDK1      | pyruvate dehydrogenase kinase, isozyme 1                                          |
| 7289   | TULP3     | tubby like protein 3                                                              |
| 200576 | PIP5K3    | phosphatidylinositol-3-phosphate/phosphatidylinositol 5-kinase, type III          |
| 5781   | PTPN11    | protein tyrosine phosphatase, non-receptor type 11 (Noonan syndrome 1)            |
| 5663   | PSEN1     | presenilin 1 (Alzheimer disease 3)                                                |
| 30001  | ERO1L     | ERO1-like (S. cerevisiae)                                                         |
| 2560   | GABRB1    | gamma-aminobutyric acid (GABA) A receptor, beta 1                                 |
| 11221  | DUSP10    | dual specificity phosphatase 10                                                   |
| 954    | ENTPD2    | ectonucleoside triphosphate diphosphohydrolase 2                                  |
| 655    | BMP7      | bone morphogenetic protein 7 (osteogenic protein 1)                               |
| 55437  | ALS2CR2   | amyotrophic lateral sclerosis 2 (juvenile) chromosome region, candidate 2         |
| 86     | ACTL6A    | actin-like 6A                                                                     |
| 11026  | LILRA3    | leukocyte immunoglobulin-like receptor, subfamily A (without TM domain), member 3 |
| 5521   | PPP2R2B   | protein phosphatase 2 (formerly 2A), regulatory subunit B, beta isoform           |
| 3611   | ILK       | integrin-linked kinase                                                            |
| 1128   | CHRM1     | cholinergic receptor, muscarinic 1                                                |
| 23012  | STK38L    | serine/threonine kinase 38 like                                                   |
| 1138   | CHRNA5    | cholinergic receptor, nicotinic, alpha 5                                          |
| 10487  | CAP1      | CAP, adenylate cyclase-associated protein 1 (yeast)                               |
| 2534   | FYN       | FYN oncogene related to SRC, FGR, YES                                             |
| 2046   | EPHA8     | EPH receptor A8                                                                   |
| 3705   | ITPK1     | inositol 1,3,4-triphosphate 5/6 kinase                                            |
| 7424   | VEGFC     | vascular endothelial growth factor C                                              |
| 5170   | PDPK1     | 3-phosphoinositide dependent protein kinase-1                                     |
| 10875  | FGL2      | fibrinogen-like 2                                                                 |
| 9771   | RAPGEF5   | Rap guanine nucleotide exchange factor (GEF) 5                                    |
| 2563   | GABRD     | gamma-aminobutyric acid (GABA) A receptor, delta                                  |
| 2674   | GFRA1     | GDNF family receptor alpha 1                                                      |
| 2565   | GABRG1    | gamma-aminobutyric acid (GABA) A receptor, gamma 1                                |
| 10278  | EFS       | embryonal Fyn-associated substrate                                                |
| 5468   | PPARG     | peroxisome proliferator-activated receptor gamma                                  |
| 79858  | NEK11     | NIMA (never in mitosis gene a)- related kinase 11                                 |
| 7296   | TXNRD1    | thioredoxin reductase 1                                                           |
| 1453   | CSNK1D    | casein kinase 1, delta                                                            |
| 27237  | ARHGEF16  | Rho guanine exchange factor (GEF) 16                                              |
| 5522   | PPP2R2C   | protein phosphatase 2 (formerly 2A), regulatory subunit B, gamma isoform          |
| 392    | ARHGAP1   | Rho GTPase activating protein 1                                                   |
| 83605  | CCM2      | cerebral cavernous malformation 2                                                 |
| 84675  | TRIM55    | tripartite motif-containing 55                                                    |
| 84929  | FIBCD1    | fibrinogen C domain containing 1                                                  |
| 10475  | TRIM38    | tripartite motif-containing 38                                                    |
| 634    | CEACAM1   | carcinoembryonic antigen-related cell adhesion molecule 1 (biliary glycoprotein)  |
| 10486  | CAP2      | CAP, adenylate cyclase-associated protein, 2 (yeast)                              |
| 183    | AGT       | angiotensinogen (serpin peptidase inhibitor, clade A, member 8)                   |

|        |          |                                                                                          |
|--------|----------|------------------------------------------------------------------------------------------|
| 7186   | TRAF2    | TNF receptor-associated factor 2                                                         |
| 9051   | PSTPIP1  | proline-serine-threonine phosphatase interacting protein 1                               |
| 5601   | MAPK9    | mitogen-activated protein kinase 9                                                       |
| 655    | BMP7     | bone morphogenetic protein 7 (osteogenic protein 1)                                      |
| 27180  | SIGLEC9  | sialic acid binding Ig-like lectin 9                                                     |
| 2664   | GDI1     | GDP dissociation inhibitor 1                                                             |
| 7132   | TNFRSF1A | tumor necrosis factor receptor superfamily, member 1A                                    |
| 164656 | TMPRSS6  | transmembrane protease, serine 6                                                         |
| 4086   | SMAD1    | SMAD family member 1                                                                     |
| 9784   | SNX17    | sorting nexin 17                                                                         |
| 57522  | SRGAP1   | SLIT-ROBO Rho GTPase activating protein 1                                                |
| 6788   | STK3     | serine/threonine kinase 3 (STE20 homolog, yeast)                                         |
| 842    | CASP9    | caspase 9, apoptosis-related cysteine peptidase                                          |
| 10617  | STAMPB   | STAM binding protein                                                                     |
| 8428   | STK24    | serine/threonine kinase 24 (STE20 homolog, yeast)                                        |
| 3696   | ITGB8    | integrin, beta 8                                                                         |
| 11006  | LILRB4   | leukocyte immunoglobulin-like receptor, subfamily B (with TM and ITIM domains), member 4 |
| 920    | CD4      | CD4 molecule                                                                             |
| 2516   | NR5A1    | nuclear receptor subfamily 5, group A, member 1                                          |
| 11329  | STK38    | serine/threonine kinase 38                                                               |
| 2562   | GABRB3   | gamma-aminobutyric acid (GABA) A receptor, beta 3                                        |
| 8854   | ALDH1A2  | aldehyde dehydrogenase 1 family, member A2                                               |
| 2556   | GABRA3   | gamma-aminobutyric acid (GABA) A receptor, alpha 3                                       |
| 816    | CAMK2B   | calcium/calmodulin-dependent protein kinase (CaM kinase) II beta                         |
| 6095   | RORA     | RAR-related orphan receptor A                                                            |
| 5153   | PDE1B    | phosphodiesterase 1B, calmodulin-dependent                                               |
| 3454   | IFNAR1   | interferon (alpha, beta and omega) receptor 1                                            |
| 5584   | PRKI     | protein kinase C, iota                                                                   |
| 4929   | NR4A2    | nuclear receptor subfamily 4, group A, member 2                                          |
| 3680   | ITGA9    | integrin, alpha 9                                                                        |
| 11216  | AKAP10   | A kinase (PRKA) anchor protein 10                                                        |
| 156    | ADRBK1   | adrenergic, beta, receptor kinase 1                                                      |
| 1856   | DVL2     | dishevelled, dsh homolog 2 (Drosophila)                                                  |
| 139135 | PASD1    | PAS domain containing 1                                                                  |
| 4828   | NMB      | neuromedin B                                                                             |
| 2444   | FRK      | fyn-related kinase                                                                       |
| 10188  | TNK2     | tyrosine kinase, non-receptor, 2                                                         |
| 80778  | ZNF34    | zinc finger protein 34                                                                   |
| 10758  | TRAF3IP2 | TRAF3 interacting protein 2                                                              |
| 51676  | ASB2     | ankyrin repeat and SOCS box-containing 2                                                 |
| 8945   | BTRC     | beta-transducin repeat containing                                                        |
| 29127  | RACGAP1  | Rac GTPase activating protein 1                                                          |
| 55198  | DIP13B   | DIP13 beta                                                                               |
| 2982   | GUCY1A3  | guanylate cyclase 1, soluble, alpha 3                                                    |
| 3954   | LETM1    | leucine zipper-EF-hand containing transmembrane protein 1                                |
| 9146   | HGS      | hepatocyte growth factor-regulated tyrosine kinase substrate                             |
| 6003   | RGS13    | regulator of G-protein signalling 13                                                     |
| 3055   | HCK      | hemopoietic cell kinase                                                                  |
| 23432  | GPR161   | G protein-coupled receptor 161                                                           |
| 152273 | FGD5     | FYVE, RhoGEF and PH domain containing 5                                                  |
| 10636  | RGS14    | regulator of G-protein signalling 14                                                     |
| 5905   | RANGAP1  | Ran GTPase activating protein 1                                                          |
| 9466   | IL27RA   | interleukin 27 receptor, alpha                                                           |
| 85360  | SYDE1    | synapse defective 1, Rho GTPase, homolog 1 (C. elegans)                                  |
| 25780  | RASGRP3  | RAS guanyl releasing protein 3 (calcium and DAG-regulated)                               |
| 79092  | CARD14   | caspase recruitment domain family, member 14                                             |
| 150094 | SNF1LK   | SNF1-like kinase                                                                         |
| 404033 | FLJ34077 | weakly similar to zinc finger protein 195                                                |
| 90     | ACVR1    | activin A receptor, type I                                                               |
| 55789  | DEPDC1B  | DEP domain containing 1B                                                                 |
| 10276  | NET1     | neuroepithelial cell transforming gene 1                                                 |
| 10133  | OPTN     | optineurin                                                                               |
| 2870   | GRK6     | G protein-coupled receptor kinase 6                                                      |
| 64123  | ELTD1    | EGF, latrophilin and seven transmembrane domain containing 1                             |
| 10403  | KNTC2    | kinetochore associated 2                                                                 |
| 7148   | TNXB     | tenascin XB                                                                              |
| 166614 | DCAMKL2  | doublecortin and CaM kinase-like 2                                                       |
| 131566 | DCBLD2   | discoidin, CUB and LCCL domain containing 2                                              |
| 7097   | TLR2     | toll-like receptor 2                                                                     |
| 149111 | CNIH3    | cornichon homolog 3 (Drosophila)                                                         |
| 10818  | FRS2     | fibroblast growth factor receptor substrate 2                                            |
| 57568  | SIPA1L2  | signal-induced proliferation-associated 1 like 2                                         |
| 84976  | DISP1    | dispatched homolog 1 (Drosophila)                                                        |
| 5187   | PER1     | period homolog 1 (Drosophila)                                                            |
| 10990  | LILRB5   | leukocyte immunoglobulin-like receptor, subfamily B (with TM and ITIM domains), member 5 |
| 6850   | SYK      | spleen tyrosine kinase                                                                   |

|        |          |                                                                                                           |
|--------|----------|-----------------------------------------------------------------------------------------------------------|
| 5894   | RAF1     | v-raf-1 murine leukemia viral oncogene homolog 1                                                          |
| 660    | BMX      | BMX non-receptor tyrosine kinase                                                                          |
| 10044  | SH2D3C   | SH2 domain containing 3C                                                                                  |
| 64693  | CTAGE1   | cutaneous T-cell lymphoma-associated antigen 1                                                            |
| 22920  | KIFAP3   | kinesin-associated protein 3                                                                              |
| 1164   | CKS2     | CDC28 protein kinase regulatory subunit 2                                                                 |
| 7984   | ARHGEF5  | Rho guanine nucleotide exchange factor (GEF) 5                                                            |
| 10083  | USH1C    | Usher syndrome 1C (autosomal recessive, severe)                                                           |
| 9815   | GIT2     | G protein-coupled receptor kinase interactor 2                                                            |
| 9063   | PIAS2    | protein inhibitor of activated STAT, 2                                                                    |
| 2896   | GRN      | granulin                                                                                                  |
| 89941  | RHOT2    | ras homolog gene family, member T2                                                                        |
| 10928  | RALBP1   | ralA binding protein 1                                                                                    |
| 6574   | SLC20A1  | solute carrier family 20 (phosphate transporter), member 1                                                |
| 10446  | LRRN5    | leucine rich repeat neuronal 5                                                                            |
| 6775   | STAT4    | signal transducer and activator of transcription 4                                                        |
| 9779   | TBC1D5   | TBC1 domain family, member 5                                                                              |
| 9547   | CXCL14   | chemokine (C-X-C motif) ligand 14                                                                         |
| 8685   | MARCO    | macrophage receptor with collagenous structure                                                            |
| 5152   | PDE9A    | phosphodiesterase 9A                                                                                      |
| 2557   | GABRA4   | gamma-aminobutyric acid (GABA) A receptor, alpha 4                                                        |
| 8324   | FZD7     | frizzled homolog 7 (Drosophila)                                                                           |
| 5027   | P2RX7    | purinergic receptor P2X, ligand-gated ion channel, 7                                                      |
| 3718   | JAK3     | Janus kinase 3 (a protein tyrosine kinase, leukocyte)                                                     |
| 9639   | ARHGEF10 | Rho guanine nucleotide exchange factor (GEF) 10                                                           |
| 10767  | HBS1L    | HBS1-like (S. cerevisiae)                                                                                 |
| 5597   | MAPK6    | mitogen-activated protein kinase 6                                                                        |
| 9927   | MFN2     | mitofusin 2                                                                                               |
| 5298   | PIK4CB   | phosphatidylinositol 4-kinase, catalytic, beta polypeptide                                                |
| 10458  | BAIAP2   | BAI1-associated protein 2                                                                                 |
| 7188   | TRAF5    | TNF receptor-associated factor 5                                                                          |
| 9567   | GTPBP1   | GTP binding protein 1                                                                                     |
| 150209 | AIFM3    | apoptosis-inducing factor, mitochondrion-associated, 3                                                    |
| 1997   | ELF1     | E74-like factor 1 (ets domain transcription factor)                                                       |
| 4599   | MX1      | myxovirus (influenza virus) resistance 1, interferon-inducible protein p78 (mouse)                        |
| 85415  | RHPN2    | rhopilin, Rho GTPase binding protein 2                                                                    |
| 1606   | DGKA     | diacylglycerol kinase, alpha 80kDa                                                                        |
| 7088   | TLE1     | transducin-like enhancer of split 1 (E(sp1) homolog, Drosophila)                                          |
| 7356   | SCGB1A1  | secretoglobin, family 1A, member 1 (uteroglobin)                                                          |
| 808    | CALM3    | calmodulin 3 (phosphorylase kinase, delta)                                                                |
| 26578  | OSTF1    | osteoclast stimulating factor 1                                                                           |
| 115761 | ARL11    | ADP-ribosylation factor-like 11                                                                           |
| 387    | RHOA     | ras homolog gene family, member A                                                                         |
| 6009   | RHEB     | Ras homolog enriched in brain                                                                             |
| 1410   | CRYAB    | crystallin, alpha B                                                                                       |
| 113835 | ZNF257   | zinc finger protein 257                                                                                   |
| 2811   | GP1BA    | glycoprotein Ib (platelet), alpha polypeptide                                                             |
| 51517  | NCKIPSD  | NCK interacting protein with SH3 domain                                                                   |
| 7089   | TLE2     | transducin-like enhancer of split 2 (E(sp1) homolog, Drosophila)                                          |
| 2059   | EPS8     | epidermal growth factor receptor pathway substrate 8                                                      |
| 5822   | PWP2     | PWP2 periodic tryptophan protein homolog (yeast)                                                          |
| 885    | CCK      | cholecystokinin                                                                                           |
| 377    | ARF3     | ADP-ribosylation factor 3                                                                                 |
| 28511  | NKIRAS2  | NFKB inhibitor interacting Ras-like 2                                                                     |
| 22800  | RRAS2    | related RAS viral (r-ras) oncogene homolog 2                                                              |
| 5996   | RGS1     | regulator of G-protein signalling 1                                                                       |
| 91584  | PLXNA4B  | plexin A4, B                                                                                              |
| 3932   | LCK      | lymphocyte-specific protein tyrosine kinase                                                               |
| 5777   | PTPN6    | protein tyrosine phosphatase, non-receptor type 6                                                         |
| 79798  | ARMC5    | armadillo repeat containing 5                                                                             |
| 10512  | SEMA3C   | sema domain, immunoglobulin domain (Ig), short basic domain, secreted, (semaphorin) 3C                    |
| 9754   | STARD8   | START domain containing 8                                                                                 |
| 5979   | RET      | ret proto-oncogene (multiple endocrine neoplasia and medullary thyroid carcinoma 1, Hirschsprung disease) |
| 381    | ARF5     | ADP-ribosylation factor 5                                                                                 |
| 127829 | ARL8A    | ADP-ribosylation factor-like 8A                                                                           |
| 51128  | SAR1B    | SAR1 gene homolog B (S. cerevisiae)                                                                       |
| 4049   | LTA      | lymphotoxin alpha (TNF superfamily, member 1)                                                             |
| 400    | ARL1     | ADP-ribosylation factor-like 1                                                                            |
| 8837   | CFLAR    | CASP8 and FADD-like apoptosis regulator                                                                   |
| 23786  | BCL2L13  | BCL2-like 13 (apoptosis facilitator)                                                                      |
| 26060  | APPL     | adaptor protein containing pH domain, PTB domain and leucine zipper motif 1                               |
| 7409   | VAV1     | vav 1 oncogene                                                                                            |
| 9064   | MAP3K6   | mitogen-activated protein kinase kinase kinase 6                                                          |
| 22983  | MST1     | microtubule associated serine/threonine kinase 1                                                          |
| 10025  | THRAP5   | thyroid hormone receptor associated protein 5                                                             |

|        |          |                                                                                                              |
|--------|----------|--------------------------------------------------------------------------------------------------------------|
| 3600   | IL15     | interleukin 15                                                                                               |
| 54769  | DIRAS2   | DIRAS family, GTP-binding RAS-like 2                                                                         |
| 6013   | RLN1     | relaxin 1                                                                                                    |
| 23421  | ITGB3BP  | integrin beta 3 binding protein (beta3-endonexin)                                                            |
| 334    | APLP2    | amyloid beta (A4) precursor-like protein 2                                                                   |
| 8767   | RIPK2    | receptor-interacting serine-threonine kinase 2                                                               |
| 5598   | MAPK7    | mitogen-activated protein kinase 7                                                                           |
| 204851 | HIPK1    | homeodomain interacting protein kinase 1                                                                     |
| 5294   | PIK3CG   | phosphoinositide-3-kinase, catalytic, gamma polypeptide                                                      |
| 10517  | FBXW10   | F-box and WD-40 domain protein 10                                                                            |
| 2257   | FGF12    | fibroblast growth factor 12                                                                                  |
| 5865   | RAB3B    | RAB3B, member RAS oncogene family                                                                            |
| 578    | BAK1     | BCL2-antagonist/killer 1                                                                                     |
| 11075  | STMN2    | stathmin-like 2                                                                                              |
| 55684  | C9orf86  | chromosome 9 open reading frame 86                                                                           |
| 64396  | GMCL1L   | germ cell-less homolog 1 (Drosophila)-like                                                                   |
| 9943   | OXSRI    | oxidative-stress responsive 1                                                                                |
| 329    | BIRC2    | baculoviral IAP repeat-containing 2                                                                          |
| 2908   | NR3C1    | nuclear receptor subfamily 3, group C, member 1 (glucocorticoid receptor)                                    |
| 84812  | PLCD4    | phospholipase C, delta 4                                                                                     |
| 58484  | NLRC4    | NLR family, CARD domain containing 4                                                                         |
| 5158   | PDE6B    | phosphodiesterase 6B, cGMP-specific, rod, beta (congenital stationary night blindness 3, autosomal dominant) |
| 6447   | SCG5     | secretogranin V (7B2 protein)                                                                                |
| 51552  | RAB14    | RAB14, member RAS oncogene family                                                                            |
| 2641   | GCG      | glucagon                                                                                                     |
| 1827   | DSCR1    | Down syndrome critical region gene 1                                                                         |
| 382    | ARF6     | ADP-ribosylation factor 6                                                                                    |
| 7205   | TRIP6    | thyroid hormone receptor interactor 6                                                                        |
| 7052   | TGM2     | transglutaminase 2 (C polypeptide, protein-glutamine-gamma-glutamyltransferase)                              |
| 29110  | TBK1     | TANK-binding kinase 1                                                                                        |
| 115704 | EVI5L    | ecotropic viral integration site 5-like                                                                      |
| 57679  | ALS2     | amyotrophic lateral sclerosis 2 (juvenile)                                                                   |
| 701    | BUB1B    | BUB1 budding uninhibited by benzimidazoles 1 homolog beta (yeast)                                            |
| 91662  | NLRP12   | NLR family, pyrin domain containing 12                                                                       |
| 1649   | DDIT3    | DNA-damage-inducible transcript 3                                                                            |
| 375    | ARF1     | ADP-ribosylation factor 1                                                                                    |
| 5879   | RAC1     | ras-related C3 botulinum toxin substrate 1 (rho family, small GTP binding protein Rac1)                      |
| 4218   | RAB8A    | RAB8A, member RAS oncogene family                                                                            |
| 5744   | PTH1H    | parathyroid hormone-like hormone                                                                             |
| 51130  | ASB3     | ankyrin repeat and SOCS box-containing 3                                                                     |
| 373    | TRIM23   | tripartite motif-containing 23                                                                               |
| 3728   | JUP      | junction plakoglobin                                                                                         |
| 119437 | CTAGEP   | CTAGE family pseudogene                                                                                      |
| 2132   | EXT2     | exostoses (multiple) 2                                                                                       |
| 51510  | CHMP5    | chromatin modifying protein 5                                                                                |
| 84100  | ARL6     | ADP-ribosylation factor-like 6                                                                               |
| 9308   | CD83     | CD83 molecule                                                                                                |
| 5504   | PPP1R2   | protein phosphatase 1, regulatory (inhibitor) subunit 2                                                      |
| 23291  | FBXW11   | F-box and WD-40 domain protein 11                                                                            |
| 55296  | TBC1D19  | TBC1 domain family, member 19                                                                                |
| 369    | ARAF     | v-ras murine sarcoma 3611 viral oncogene homolog                                                             |
| 9610   | RIN1     | Ras and Rab interactor 1                                                                                     |
| 9915   | ARNT2    | aryl-hydrocarbon receptor nuclear translocator 2                                                             |
| 9922   | IQSEC1   | IQ motif and Sec7 domain 1                                                                                   |
| 11069  | RAPGEF4  | Rap guanine nucleotide exchange factor (GEF) 4                                                               |
| 11183  | MAP4K5   | mitogen-activated protein kinase kinase kinase kinase 5                                                      |
| 8204   | NRIP1    | nuclear receptor interacting protein 1                                                                       |
| 5336   | PLCG2    | phospholipase C, gamma 2 (phosphatidylinositol-specific)                                                     |
| 51347  | TAOK3    | TAO kinase 3                                                                                                 |
| 2787   | GNG5     | guanine nucleotide binding protein (G protein), gamma 5                                                      |
| 8742   | TNFSF12  | tumor necrosis factor (ligand) superfamily, member 12                                                        |
| 63940  | GPSM3    | G-protein signalling modulator 3 (AGS3-like, C. elegans)                                                     |
| 5899   | RALB     | v-ras simian leukemia viral oncogene homolog B (ras related; GTP binding protein)                            |
| 9093   | DNAJA3   | DnaJ (Hsp40) homolog, subfamily A, member 3                                                                  |
| 8764   | TNFRSF14 | tumor necrosis factor receptor superfamily, member 14 (herpesvirus entry mediator)                           |
| 8440   | NCK2     | NCK adaptor protein 2                                                                                        |
| 8698   | EDG6     | endothelial differentiation, lysophosphatidic acid G-protein-coupled receptor, 6                             |
| 5168   | ENPP2    | ectonucleotide pyrophosphatase/phosphodiesterase 2 (autotaxin)                                               |
| 8437   | RASAL1   | RAS protein activator like 1 (GAP1 like)                                                                     |
| 6195   | RPS6KA1  | ribosomal protein S6 kinase, 90kDa, polypeptide 1                                                            |
| 118987 | PDZD8    | PDZ domain containing 8                                                                                      |
| 2791   | GNG11    | guanine nucleotide binding protein (G protein), gamma 11                                                     |
| 23362  | PSD3     | pleckstrin and Sec7 domain containing 3                                                                      |
| 51806  | CALML5   | calmodulin-like 5                                                                                            |
| 326624 | RAB37    | RAB37, member RAS oncogene family                                                                            |

|        |          |                                                                                                                          |
|--------|----------|--------------------------------------------------------------------------------------------------------------------------|
| 9112   | MTA1     | metastasis associated 1                                                                                                  |
| 7020   | TFAP2A   | transcription factor AP-2 alpha (activating enhancer binding protein 2 alpha)                                            |
| 10342  | TFG      | TRK-fused gene                                                                                                           |
| 23360  | FNBP4    | formin binding protein 4                                                                                                 |
| 5159   | PDGFRB   | platelet-derived growth factor receptor, beta polypeptide                                                                |
| 2260   | FGFR1    | fibroblast growth factor receptor 1 (fms-related tyrosine kinase 2, Pfeiffer syndrome)                                   |
| 155370 | SBDSP    | Shwachman-Bodian-Diamond syndrome pseudogene                                                                             |
| 2788   | GNG7     | guanine nucleotide binding protein (G protein), gamma 7                                                                  |
| 4286   | MITF     | microphthalmia-associated transcription factor                                                                           |
| 54509  | RHOF     | ras homolog gene family, member F (in filopodia)                                                                         |
| 65997  | RASL11B  | RAS-like, family 11, member B                                                                                            |
| 682    | BSG      | basigin (Ok blood group)                                                                                                 |
| 51562  | MBIP     | MAP3K12 binding inhibitory protein 1                                                                                     |
| 10681  | GNB5     | guanine nucleotide binding protein (G protein), beta 5                                                                   |
| 6242   | RTKN     | rhotekin                                                                                                                 |
| 8473   | OGT      | O-linked N-acetylglucosamine (GlcNAc) transferase (UDP-N-acetylglucosamine:polypeptide-N-acetylglucosaminyl transferase) |
| 3693   | ITGB5    | integrin, beta 5                                                                                                         |
| 5585   | PKN1     | protein kinase N1                                                                                                        |
| 10019  | SH2B3    | SH2B adaptor protein 3                                                                                                   |
| 4852   | NPY      | neuropeptide Y                                                                                                           |
| 2537   | IFI6     | interferon, alpha-inducible protein 6                                                                                    |
| 5368   | PNOC     | prepronociceptin                                                                                                         |
| 51266  | CLEC1B   | C-type lectin domain family 1, member B                                                                                  |
| 2771   | GNAI2    | guanine nucleotide binding protein (G protein), alpha inhibiting activity polypeptide 2                                  |
| 9630   | GNA14    | guanine nucleotide binding protein (G protein), alpha 14                                                                 |
| 1432   | MAPK14   | mitogen-activated protein kinase 14                                                                                      |
| 5528   | PPP2R5D  | protein phosphatase 2, regulatory subunit B', delta isoform                                                              |
| 9138   | ARHGEF1  | Rho guanine nucleotide exchange factor (GEF) 1                                                                           |
| 9372   | ZFYVE9   | zinc finger, FYVE domain containing 9                                                                                    |
| 7075   | TIE1     | tyrosine kinase with immunoglobulin-like and EGF-like domains 1                                                          |
| 5319   | PLA2G1B  | phospholipase A2, group IB (pancreas)                                                                                    |
| 55890  | GPRC5C   | G protein-coupled receptor, family C, group 5, member C                                                                  |
| 4879   | NPPB     | natriuretic peptide precursor B                                                                                          |
| 54360  | CYTL1    | cytokine-like 1                                                                                                          |
| 57414  | RHBDD2   | rhomboid domain containing 2                                                                                             |
| 23647  | ARFIP2   | ADP-ribosylation factor interacting protein 2 (arfaptin 2)                                                               |
| 1459   | CSNK2A2  | casein kinase 2, alpha prime polypeptide                                                                                 |
| 128637 | TBC1D20  | TBC1 domain family, member 20                                                                                            |
| 5747   | PTK2     | PTK2 protein tyrosine kinase 2                                                                                           |
| 488    | ATP2A2   | ATPase, Ca++ transporting, cardiac muscle, slow twitch 2                                                                 |
| 9033   | PKD2L1   | polycystic kidney disease 2-like 1                                                                                       |
| 9765   | ZFYVE16  | zinc finger, FYVE domain containing 16                                                                                   |
| 6232   | RPS27    | ribosomal protein S27 (metallopanstimulin 1)                                                                             |
| 4282   | MIF      | macrophage migration inhibitory factor (glycosylation-inhibiting factor)                                                 |
| 80045  | GPR157   | G protein-coupled receptor 157                                                                                           |
| 219995 | MGC35295 | hypothetical protein MGC35295                                                                                            |
| 1392   | CRH      | corticotropin releasing hormone                                                                                          |
| 307    | ANXA4    | annexin A4                                                                                                               |
| 3597   | IL13RA1  | interleukin 13 receptor, alpha 1                                                                                         |
| 9908   | G3BP2    | GTPase activating protein (SH3 domain) binding protein 2                                                                 |
| 7791   | ZYX      | zyxin                                                                                                                    |
| 3683   | ITGAL    | integrin, alpha L (antigen CD11A (p180), lymphocyte function-associated antigen 1; alpha polypeptide)                    |
| 3687   | ITGAX    | integrin, alpha X (complement component 3 receptor 4 subunit)                                                            |
| 558    | AXL      | AXL receptor tyrosine kinase                                                                                             |
| 2909   | GRLF1    | glucocorticoid receptor DNA binding factor 1                                                                             |
| 55114  | ARHGAP17 | Rho GTPase activating protein 17                                                                                         |
| 50852  | TRAT1    | T cell receptor associated transmembrane adaptor 1                                                                       |
| 29121  | CLEC2D   | C-type lectin domain family 2, member D                                                                                  |
| 8772   | FADD     | Fas (TNFRSF6)-associated via death domain                                                                                |
| 219928 | MRGPRF   | MAS-related GPR, member F                                                                                                |
| 6769   | STAC     | SH3 and cysteine rich domain                                                                                             |
| 3594   | IL12RB1  | interleukin 12 receptor, beta 1                                                                                          |
| 7297   | TYK2     | tyrosine kinase 2                                                                                                        |
| 8500   | PPFIA1   | protein tyrosine phosphatase, receptor type, f polypeptide (PTPRF), interacting protein (liprin), alpha 1                |
| 9373   | PLAA     | phospholipase A2-activating protein                                                                                      |
| 3845   | KRAS     | v-Ki-ras2 Kirsten rat sarcoma viral oncogene homolog                                                                     |
| 8365   | HIST1H4H | histone cluster 1, H4h                                                                                                   |
| 767    | CA8      | carbonic anhydrase VIII                                                                                                  |
| 970    | CD70     | CD70 molecule                                                                                                            |
| 9022   | CLIC3    | chloride intracellular channel 3                                                                                         |
| 8614   | STC2     | stanniocalcin 2                                                                                                          |
| 409    | ARRB2    | arrestin, beta 2                                                                                                         |
| 23616  | SH3BP1   | SH3-domain binding protein 1                                                                                             |



|        |          |                                                                                                       |
|--------|----------|-------------------------------------------------------------------------------------------------------|
| 80778  | ZNF34    | zinc finger protein 34                                                                                |
| 23741  | EID1     | EP300 interacting inhibitor of differentiation 1                                                      |
| 284521 | OR2L13   | olfactory receptor, family 2, subfamily L, member 13                                                  |
| 7048   | TGFBR2   | transforming growth factor, beta receptor II (70/80kDa)                                               |
| 26716  | OR2H1    | olfactory receptor, family 2, subfamily H, member 1                                                   |
| 2774   | GNAL     | guanine nucleotide binding protein (G protein), alpha activating activity polypeptide, olfactory type |
| 7525   | YES1     | v-src-1 Yamaguchi sarcoma viral oncogene homolog 1                                                    |
| 9910   | RABGAP1L | RAB GTPase activating protein 1-like                                                                  |
| 57569  | ARHGAP20 | Rho GTPase activating protein 20                                                                      |
| 140    | ADORA3   | adenosine A3 receptor                                                                                 |
| 27297  | RCP9     | calcitonin gene-related peptide-receptor component protein                                            |
| 1140   | CHRNA1   | cholinergic receptor, nicotinic, beta 1 (muscle)                                                      |
| 27352  | RUTBC3   | RUN and TBC1 domain containing 3                                                                      |
| 8743   | TNFSF10  | tumor necrosis factor (ligand) superfamily, member 10                                                 |
| 657    | BMPRI1A  | bone morphogenetic protein receptor, type IA                                                          |
| 8738   | CRADD    | CASP2 and RIPK1 domain containing adaptor with death domain                                           |
| 5562   | PRKAA1   | protein kinase, AMP-activated, alpha 1 catalytic subunit                                              |
| 1133   | CHRM5    | cholinergic receptor, muscarinic 5                                                                    |
| 6498   | SKIL     | SKI-like oncogene                                                                                     |
| 2983   | GUCY1B3  | guanylate cyclase 1, soluble, beta 3                                                                  |
| 7090   | TLE3     | transducin-like enhancer of split 3 (E(sp1) homolog, Drosophila)                                      |
| 2913   | GRM3     | glutamate receptor, metabotropic 3                                                                    |
| 2564   | GABRE    | gamma-aminobutyric acid (GABA) A receptor, epsilon                                                    |
| 84106  | PRAM1    | PML-RARA regulated adaptor molecule 1                                                                 |
| 726    | CAPN5    | calpain 5                                                                                             |
| 2865   | FFAR3    | free fatty acid receptor 3                                                                            |
| 3937   | LCP2     | lymphocyte cytosolic protein 2 (SH2 domain containing leukocyte protein of 76kDa)                     |
| 1442   | CSH1     | chorionic somatomammotropin hormone 1 (placental lactogen)                                            |
| 2776   | GNAAQ    | guanine nucleotide binding protein (G protein), q polypeptide                                         |
| 5562   | PRKAA1   | protein kinase, AMP-activated, alpha 1 catalytic subunit                                              |
| 11213  | IRAK3    | interleukin-1 receptor-associated kinase 3                                                            |
| 23390  | ZDHHC17  | zinc finger, DHHC-type containing 17                                                                  |
| 2905   | GRIN2C   | glutamate receptor, ionotropic, N-methyl D-aspartate 2C                                               |
| 7301   | TYRO3    | TYRO3 protein tyrosine kinase                                                                         |
| 83593  | RASSF5   | Ras association (RalGDS/AF-6) domain family 5                                                         |
| 10922  | FASTK    | Fas-activated serine/threonine kinase                                                                 |
| 4869   | NPM1     | nucleophosmin (nucleolar phosphoprotein B23, numatrin)                                                |
| 389    | RHOC     | ras homolog gene family, member C                                                                     |
| 7189   | TRAF6    | TNF receptor-associated factor 6                                                                      |
| 353149 | MGC51025 | hypothetical protein MGC51025                                                                         |
| 5026   | P2RX5    | purinergic receptor P2X, ligand-gated ion channel, 5                                                  |
| 7554   | ZNF8     | zinc finger protein 8                                                                                 |
| 1272   | CNTN1    | contactin 1                                                                                           |
| 23560  | GTPBP4   | GTP binding protein 4                                                                                 |
| 150372 | NFAM1    | NFAT activating protein with ITAM motif 1                                                             |
| 160851 | DGKH     | diacylglycerol kinase, eta                                                                            |
| 255426 | RASGEF1C | RasGEF domain family, member 1C                                                                       |
| 1363   | CPE      | carboxypeptidase E                                                                                    |
| 8326   | FZD9     | frizzled homolog 9 (Drosophila)                                                                       |
| 3164   | NR4A1    | nuclear receptor subfamily 4, group A, member 1                                                       |
| 7179   | TPTE     | transmembrane phosphatase with tensin homology                                                        |
| 9450   | LY86     | lymphocyte antigen 86                                                                                 |
| 2742   | GLRA2    | glycine receptor, alpha 2                                                                             |
| 2359   | FPRL2    | formyl peptide receptor-like 2                                                                        |
| 23385  | NCSTN    | nicastatin                                                                                            |
| 9886   | RHOBTB1  | Rho-related BTB domain containing 1                                                                   |
| 10566  | AKAP3    | A kinase (PRKA) anchor protein 3                                                                      |
| 6009   | RHEB     | Ras homolog enriched in brain                                                                         |
| 83871  | RAB34    | RAB34, member RAS oncogene family                                                                     |
| 6714   | SRC      | v-src sarcoma (Schmidt-Ruppin A-2) viral oncogene homolog (avian)                                     |
| 25928  | SOSTDC1  | sclerostin domain containing 1                                                                        |
| 4916   | NRK3     | neurotrophic tyrosine kinase, receptor, type 3                                                        |
| 127247 | ASB17    | ankyrin repeat and SOCS box-containing 17                                                             |
| 9364   | RAB28    | RAB28, member RAS oncogene family                                                                     |
| 1809   | DPYSL3   | dihydropyrimidinase-like 3                                                                            |
| 340307 | CTAGE6   | CTAGE family, member 6                                                                                |
| 9712   | USP6NL   | USP6 N-terminal like                                                                                  |
| 91608  | RASL10B  | RAS-like, family 10, member B                                                                         |
| 56674  | TMEM9B   | TMEM9 domain family, member B                                                                         |
| 8611   | PPAP2A   | phosphatidic acid phosphatase type 2A                                                                 |
| 55023  | PHIP     | pleckstrin homology domain interacting protein                                                        |
| 7130   | TNFAIP6  | tumor necrosis factor, alpha-induced protein 6                                                        |
| 11069  | RAPGEF4  | Rap guanine nucleotide exchange factor (GEF) 4                                                        |
| 91319  | DERL3    | Der1-like domain family, member 3                                                                     |
| 6457   | SH3GL3   | SH3-domain GRB2-like 3                                                                                |
| 54361  | WNT4     | wingless-type MMTV integration site family, member 4                                                  |

|        |           |                                                                                         |
|--------|-----------|-----------------------------------------------------------------------------------------|
| 2781   | GNAZ      | guanine nucleotide binding protein (G protein), alpha z polypeptide                     |
| 257019 | FRMD3     | FERM domain containing 3                                                                |
| 2861   | GPR37     | G protein-coupled receptor 37 (endothelin receptor type B-like)                         |
| 56674  | TMEM9B    | TMEM9 domain family, member B                                                           |
| 3146   | HMGB1     | high-mobility group box 1                                                               |
| 56896  | DPYSL5    | dihydropyrimidinase-like 5                                                              |
| 64283  | RGNEF     | Rho-guanine nucleotide exchange factor                                                  |
| 4724   | NDUFS4    | NADH dehydrogenase (ubiquinone) Fe-S protein 4, 18kDa (NADH-coenzyme Q reductase)       |
| 9702   | CEP57     | centrosomal protein 57kDa                                                               |
| 9021   | SOCS3     | suppressor of cytokine signaling 3                                                      |
| 10316  | NMUR1     | neuromedin U receptor 1                                                                 |
| 7786   | MAP3K12   | mitogen-activated protein kinase kinase kinase 12                                       |
| 10580  | SORBS1    | sorbin and SH3 domain containing 1                                                      |
| 5791   | PTPRE     | protein tyrosine phosphatase, receptor type, E                                          |
| 153743 | PPP1R2P3  | protein phosphatase 1, regulatory (inhibitor) subunit 2 pseudogene 3                    |
| 261734 | NPHP4     | nephronophthisis 4                                                                      |
| 29883  | CNOT7     | CCR4-NOT transcription complex, subunit 7                                               |
| 5746   | PTH2R     | parathyroid hormone receptor 2                                                          |
| 94     | ACVRL1    | activin A receptor type II-like 1                                                       |
| 1890   | ECGF1     | endothelial cell growth factor 1 (platelet-derived)                                     |
| 9852   | EPM2AIP1  | EPM2A (laforin) interacting protein 1                                                   |
| 9989   | PPP4R1    | protein phosphatase 4, regulatory subunit 1                                             |
| 51285  | RASL12    | RAS-like, family 12                                                                     |
| 27237  | ARHGEF16  | Rho guanine exchange factor (GEF) 16                                                    |
| 658    | BMPR1B    | bone morphogenetic protein receptor, type IB                                            |
| 4059   | BCAM      | basal cell adhesion molecule (Lutheran blood group)                                     |
| 347694 | ECEL1P2   | endothelin converting enzyme-like 1, pseudogene 2                                       |
| 5333   | PLCD1     | phospholipase C, delta 1                                                                |
| 4983   | OPHN1     | oligophrenin 1                                                                          |
| 5023   | P2RX1     | purinergic receptor P2X, ligand-gated ion channel, 1                                    |
| 154043 | CNKSR3    | CNKSR family member 3                                                                   |
| 9213   | XPR1      | xenotropic and polytropic retrovirus receptor                                           |
| 8874   | ARHGEF7   | Rho guanine nucleotide exchange factor (GEF) 7                                          |
| 3667   | IRS1      | insulin receptor substrate 1                                                            |
| 51256  | TBC1D7    | TBC1 domain family, member 7                                                            |
| 51176  | LEF1      | lymphoid enhancer-binding factor 1                                                      |
| 59343  | SEN2      | SUMO1/sentrin/SMT3 specific peptidase 2                                                 |
| 51473  | DCDC2     | doublecortin domain containing 2                                                        |
| 5586   | PKN2      | protein kinase N2                                                                       |
| 5871   | MAP4K2    | mitogen-activated protein kinase kinase kinase kinase 2                                 |
| 27201  | GPR78     | G protein-coupled receptor 78                                                           |
| 122809 | SOCS4     | suppressor of cytokine signaling 4                                                      |
| 7474   | WNT5A     | wingless-type MMTV integration site family, member 5A                                   |
| 23178  | PASK      | PAS domain containing serine/threonine kinase                                           |
| 57533  | TBC1D14   | TBC1 domain family, member 14                                                           |
| 254263 | CNIH2     | cornichon homolog 2 (Drosophila)                                                        |
| 398    | ARHGDIG   | Rho GDP dissociation inhibitor (GDI) gamma                                              |
| 286530 | P2RY8     | purinergic receptor P2Y, G-protein coupled, 8                                           |
| 80824  | DUSP16    | dual specificity phosphatase 16                                                         |
| 8986   | RPS6KA4   | ribosomal protein S6 kinase, 90kDa, polypeptide 4                                       |
| 117157 | SH2D1B    | SH2 domain containing 1B                                                                |
| 83605  | CCM2      | cerebral cavernous malformation 2                                                       |
| 3921   | RPSA      | ribosomal protein SA                                                                    |
| 374403 | TBC1D10C  | TBC1 domain family, member 10C                                                          |
| 5915   | RARB      | retinoic acid receptor, beta                                                            |
| 10571  | SMA3      | SMA3                                                                                    |
| 81035  | COLEC12   | collectin sub-family member 12                                                          |
| 406    | ARNTL     | aryl hydrocarbon receptor nuclear translocator-like                                     |
| 10316  | NMUR1     | neuromedin U receptor 1                                                                 |
| 5972   | REN       | renin                                                                                   |
| 7133   | TNFRSF1B  | tumor necrosis factor receptor superfamily, member 1B                                   |
| 8036   | SHOC2     | soc-2 suppressor of clear homolog (C. elegans)                                          |
| 208    | AKT2      | v-akt murine thymoma viral oncogene homolog 2                                           |
| 978    | CDA       | cytidine deaminase                                                                      |
| 53829  | P2RY13    | purinergic receptor P2Y, G-protein coupled, 13                                          |
| 1903   | EDG3      | endothelial differentiation, sphingolipid G-protein-coupled receptor, 3                 |
| 2078   | ERG       | v-ets erythroblastosis virus E26 oncogene homolog (avian)                               |
| 330    | BIRC3     | baculoviral IAP repeat-containing 3                                                     |
| 22808  | MRAS      | muscle RAS oncogene homolog                                                             |
| 5879   | RAC1      | ras-related C3 botulinum toxin substrate 1 (rho family, small GTP binding protein Rac1) |
| 3921   | RPSA      | ribosomal protein SA                                                                    |
| 4088   | SMAD3     | SMAD family member 3                                                                    |
| 10454  | MAP3K7IP1 | mitogen-activated protein kinase kinase kinase 7 interacting protein 1                  |
| 54620  | FBXL19    | F-box and leucine-rich repeat protein 19                                                |
| 7422   | VEGFA     | vascular endothelial growth factor A                                                    |
| 57381  | RHOJ      | ras homolog gene family, member J                                                       |

|        |               |                                                                                           |
|--------|---------------|-------------------------------------------------------------------------------------------|
| 6609   | SMPD1         | sphingomyelin phosphodiesterase 1, acid lysosomal (acid sphingomyelinase)                 |
| 405    | ARNT          | aryl hydrocarbon receptor nuclear translocator                                            |
| 5469   | PPARBP        | PPAR binding protein                                                                      |
| 2185   | PTK2B         | PTK2B protein tyrosine kinase 2 beta                                                      |
| 10288  | LILRB2        | leukocyte immunoglobulin-like receptor, subfamily B (with TM and ITIM domains), member 2  |
| 916    | CD3E          | CD3e molecule, epsilon (CD3-TCR complex)                                                  |
| 23089  | PEG10         | paternally expressed 10                                                                   |
| 10002  | NR2E3         | nuclear receptor subfamily 2, group E, member 3                                           |
| 23636  | NUP62         | nucleoporin 62kDa                                                                         |
| 29117  | BRD7          | bromodomain containing 7                                                                  |
| 10268  | RAMP3         | receptor (G protein-coupled) activity modifying protein 3                                 |
| 5891   | RAGE          | renal tumor antigen                                                                       |
| 51098  | IFT52         | intraflagellar transport 52 homolog (Chlamydomonas)                                       |
| 6344   | SCTR          | secretin receptor                                                                         |
| 7421   | VDR           | vitamin D (1,25- dihydroxyvitamin D3) receptor                                            |
| 1672   | DEFB1         | defensin, beta 1                                                                          |
| 8626   | TP73L         | tumor protein p73-like                                                                    |
| 114898 | C1QTNF2       | C1q and tumor necrosis factor related protein 2                                           |
| 79602  | ADIPOR2       | adiponectin receptor 2                                                                    |
| 27334  | P2RY10        | purinergic receptor P2Y, G-protein coupled, 10                                            |
| 9068   | ANGPTL1       | angiopoietin-like 1                                                                       |
| 51701  | NLK           | nemo-like kinase                                                                          |
| 7301   | TYRO3         | TYRO3 protein tyrosine kinase                                                             |
| 2675   | GFRA2         | GNDF family receptor alpha 2                                                              |
| 9938   | ARHGAP25      | Rho GTPase activating protein 25                                                          |
| 10379  | ISGF3G        | interferon-stimulated transcription factor 3, gamma 48kDa                                 |
| 8633   | UNC5C         | unc-5 homolog C (C. elegans)                                                              |
| 2015   | EMR1          | egf-like module containing, mucin-like, hormone receptor-like 1                           |
| 64284  | RAB17         | RAB17, member RAS oncogene family                                                         |
| 1855   | DVL1          | dishevelled, dsh homolog 1 (Drosophila)                                                   |
| 8550   | MAPKAPK5      | mitogen-activated protein kinase-activated protein kinase 5                               |
| 5582   | PRKCG         | protein kinase C, gamma                                                                   |
| 57506  | VISA          | virus-induced signaling adapter                                                           |
| 4790   | NFKB1         | nuclear factor of kappa light polypeptide gene enhancer in B-cells 1 (p105)               |
| 10633  | RASL10A       | RAS-like, family 10, member A                                                             |
| 3082   | HGF           | hepatocyte growth factor (hepapoietin A; scatter factor)                                  |
| 5724   | PTAFR         | platelet-activating factor receptor                                                       |
| 9437   | NCR1          | natural cytotoxicity triggering receptor 1                                                |
| 374403 | TBC1D10C      | TBC1 domain family, member 10C                                                            |
| 1082   | CGB           | chorionic gonadotropin, beta polypeptide                                                  |
| 1936   | EEF1D         | eukaryotic translation elongation factor 1 delta (guanine nucleotide exchange protein)    |
| 7185   | TRAF1         | TNF receptor-associated factor 1                                                          |
| 26118  | WSB1          | WD repeat and SOCS box-containing 1                                                       |
| 6364   | CCL20         | chemokine (C-C motif) ligand 20                                                           |
| 8605   | PLA2G4C       | phospholipase A2, group IVC (cytosolic, calcium-independent)                              |
| 9180   | OSMR          | oncostatin M receptor                                                                     |
| 10971  | YWHAQ         | tyrosine 3-monooxygenase/tryptophan 5-monooxygenase activation protein, theta polypeptide |
| 55423  | SIRPG         | signal-regulatory protein gamma                                                           |
| 22900  | CARD8         | caspase recruitment domain family, member 8                                               |
| 158763 | RP13-102H20.1 | hypothetical protein FLJ30058                                                             |
| 8490   | RGS5          | regulator of G-protein signalling 5                                                       |
| 57121  | GPR92         | G protein-coupled receptor 92                                                             |
| 81472  | OR2C3         | olfactory receptor, family 2, subfamily C, member 3                                       |
| 29967  | LRP12         | low density lipoprotein-related protein 12                                                |
| 121504 | HIST4H4       | histone cluster 4, H4                                                                     |
| 26191  | PTPN22        | protein tyrosine phosphatase, non-receptor type 22 (lymphoid)                             |
| 3641   | INSL4         | insulin-like 4 (placenta)                                                                 |
| 8915   | BCL10         | B-cell CLL/lymphoma 10                                                                    |
| 25989  | ULK3          | unc-51-like kinase 3 (C. elegans)                                                         |
| 5602   | MAPK10        | mitogen-activated protein kinase 10                                                       |
| 23210  | PTDSR         | phosphatidylserine receptor                                                               |
| 140459 | ASB6          | ankyrin repeat and SOCS box-containing 6                                                  |
| 64231  | MS4A6A        | membrane-spanning 4-domains, subfamily A, member 6A                                       |
| 8681   | PLA2G4B       | phospholipase A2, group IVB (cytosolic)                                                   |
| 64805  | P2RY12        | purinergic receptor P2Y, G-protein coupled, 12                                            |
| 29034  | PRO0132       | PRO0132 protein                                                                           |
| 10892  | MALT1         | mucosa associated lymphoid tissue lymphoma translocation gene 1                           |
| 4068   | SH2D1A        | SH2 domain protein 1A, Duncan's disease (lymphoproliferative syndrome)                    |
| 27306  | PGDS          | prostaglandin D2 synthase, hematopoietic                                                  |
| 1192   | CLIC1         | chloride intracellular channel 1                                                          |
| 5565   | PRKAB2        | protein kinase, AMP-activated, beta 2 non-catalytic subunit                               |
| 9209   | LRRFIP2       | leucine rich repeat (in FLII) interacting protein 2                                       |
| 10617  | STAMBP        | STAM binding protein                                                                      |
| 55635  | DEPDC1        | DEP domain containing 1                                                                   |
| 30851  | TAX1BP3       | Tax1 (human T-cell leukemia virus type I) binding protein 3                               |
| 2773   | GNAI3         | guanine nucleotide binding protein (G protein), alpha inhibiting activity polypeptide 3   |

|        |           |                                                                            |
|--------|-----------|----------------------------------------------------------------------------|
| 898    | CCNE1     | cyclin E1                                                                  |
| 8877   | SPHK1     | sphingosine kinase 1                                                       |
| 10301  | DLEU1     | deleted in lymphocytic leukemia, 1                                         |
| 1081   | CGA       | glycoprotein hormones, alpha polypeptide                                   |
| 2243   | FGA       | fibrinogen alpha chain                                                     |
| 7253   | TSHR      | thyroid stimulating hormone receptor                                       |
| 29767  | TMOD2     | tropomodulin 2 (neuronal)                                                  |
| 23308  | ICOSLG    | inducible T-cell co-stimulator ligand                                      |
| 7535   | ZAP70     | zeta-chain (TCR) associated protein kinase 70kDa                           |
| 6198   | RPS6KB1   | ribosomal protein S6 kinase, 70kDa, polypeptide 1                          |
| 56940  | DUSP22    | dual specificity phosphatase 22                                            |
| 4982   | TNFRSF11B | tumor necrosis factor receptor superfamily, member 11b (osteoprotegerin)   |
| 3622   | ING2      | inhibitor of growth family, member 2                                       |
| 497661 | LOC497661 | putative NFkB activating protein                                           |
| 6356   | CCL11     | chemokine (C-C motif) ligand 11                                            |
| 10875  | FGL2      | fibrinogen-like 2                                                          |
| 10261  | IGSF6     | immunoglobulin superfamily, member 6                                       |
| 8601   | RGS20     | regulator of G-protein signalling 20                                       |
| 11247  | NXPH4     | neurexophilin 4                                                            |
| 10276  | NET1      | neuroepithelial cell transforming gene 1                                   |
| 6866   | TAC3      | tachykinin 3 (neuromedin K, neurokinin beta)                               |
| 55647  | RAB20     | RAB20, member RAS oncogene family                                          |
| 51466  | EVL       | Enah/Vasp-like                                                             |
| 81285  | OR51E2    | olfactory receptor, family 51, subfamily E, member 2                       |
| 9093   | DNAJA3    | DnaJ (Hsp40) homolog, subfamily A, member 3                                |
| 400713 | LOC400713 | zinc finger-like                                                           |
| 10268  | RAMP3     | receptor (G protein-coupled) activity modifying protein 3                  |
| 8839   | WISP2     | WNT1 inducible signaling pathway protein 2                                 |
| 10750  | GRAP      | GRB2-related adaptor protein                                               |
| 307    | ANXA4     | annexin A4                                                                 |
| 6424   | SFRP4     | secreted frizzled-related protein 4                                        |
| 54503  | ZDHHC13   | zinc finger, DHHC-type containing 13                                       |
| 10326  | SIRPB1    | signal-regulatory protein beta 1                                           |
| 117581 | TWIST2    | twist homolog 2 (Drosophila)                                               |
| 595    | CCND1     | cyclin D1                                                                  |
| 23543  | RBM9      | RNA binding motif protein 9                                                |
| 9765   | ZFYVE16   | zinc finger, FYVE domain containing 16                                     |
| 137196 | CCDC26    | coiled-coil domain containing 26                                           |
| 27128  | PSCD4     | pleckstrin homology, Sec7 and coiled-coil domains 4                        |
| 8839   | WISP2     | WNT1 inducible signaling pathway protein 2                                 |
| 117194 | MRGPRX2   | MAS-related GPR, member X2                                                 |
| 3556   | IL1RAP    | interleukin 1 receptor accessory protein                                   |
| 1808   | DPYSL2    | dihydropyrimidinase-like 2                                                 |
| 972    | CD74      | CD74 molecule, major histocompatibility complex, class II invariant chain  |
| 4258   | MGST2     | microsomal glutathione S-transferase 2                                     |
| 51129  | ANGPTL4   | angiopoietin-like 4                                                        |
| 347734 | SLC35B2   | solute carrier family 35, member B2                                        |
| 9730   | VPRBP     | Vpr (HIV-1) binding protein                                                |
| 6997   | TDGF1     | teratocarcinoma-derived growth factor 1                                    |
| 117157 | SH2D1B    | SH2 domain containing 1B                                                   |
| 51762  | RAB8B     | RAB8B, member RAS oncogene family                                          |
| 84932  | RAB2B     | RAB2B, member RAS oncogene family                                          |
| 3123   | HLA-DRB1  | major histocompatibility complex, class II, DR beta 1                      |
| 177    | AGER      | advanced glycosylation end product-specific receptor                       |
| 5733   | PTGER3    | prostaglandin E receptor 3 (subtype EP3)                                   |
| 84932  | RAB2B     | RAB2B, member RAS oncogene family                                          |
| 1839   | HBEGF     | heparin-binding EGF-like growth factor                                     |
| 7077   | TIMP2     | TIMP metalloproteinase inhibitor 2                                         |
| 23403  | FBXO46    | F-box protein 46                                                           |
| 5520   | PPP2R2A   | protein phosphatase 2 (formerly 2A), regulatory subunit B, alpha isoform   |
| 8368   | HIST1H4L  | histone cluster 1, H4l                                                     |
| 7252   | TSHB      | thyroid stimulating hormone, beta                                          |
| 9241   | NOG       | noggin                                                                     |
| 64407  | RGS18     | regulator of G-protein signalling 18                                       |
| 2532   | DARC      | Duffy blood group, chemokine receptor                                      |
| 53831  | GPR84     | G protein-coupled receptor 84                                              |
| 2857   | GPR34     | G protein-coupled receptor 34                                              |
| 4283   | CXCL9     | chemokine (C-X-C motif) ligand 9                                           |
| 3821   | KLRC1     | killer cell lectin-like receptor subfamily C, member 1                     |
| 166824 | RASSF6    | Ras association (RalGDS/AF-6) domain family 6                              |
| 57485  | ATXN7L1   | ataxin 7-like 1                                                            |
| 10420  | TESK2     | testis-specific kinase 2                                                   |
| 6369   | CCL24     | chemokine (C-C motif) ligand 24                                            |
| 64780  | MICAL1    | microtubule associated monooxygenase, calponin and LIM domain containing 1 |
| 51338  | MS4A4A    | membrane-spanning 4-domains, subfamily A, member 4                         |
| 83661  | MS4A8B    | membrane-spanning 4-domains, subfamily A, member 8B                        |

|        |           |                                                                                           |
|--------|-----------|-------------------------------------------------------------------------------------------|
| 9173   | IL1RL1    | interleukin 1 receptor-like 1                                                             |
| 4055   | LTBR      | lymphotoxin beta receptor (TNFR superfamily, member 3)                                    |
| 6777   | STAT5B    | signal transducer and activator of transcription 5B                                       |
| 283    | ANG       | angiogenin, ribonuclease, RNase A family, 5                                               |
| 834    | CASP1     | caspase 1, apoptosis-related cysteine peptidase (interleukin 1, beta, convertase)         |
| 10253  | SPRY2     | sprouty homolog 2 (Drosophila)                                                            |
| 3805   | KIR2DL4   | killer cell immunoglobulin-like receptor, two domains, long cytoplasmic tail, 4           |
| 8793   | TNFRSF10D | tumor necrosis factor receptor superfamily, member 10d, decoy with truncated death domain |
| 23268  | DNMBP     | dynamin binding protein                                                                   |
| 6773   | STAT2     | signal transducer and activator of transcription 2, 113kDa                                |
| 1193   | CLIC2     | chloride intracellular channel 2                                                          |
| 83464  | APH1B     | anterior pharynx defective 1 homolog B (C. elegans)                                       |
| 301    | ANXA1     | annexin A1                                                                                |
| 2923   | PDIA3     | protein disulfide isomerase family A, member 3                                            |
| 5295   | PIK3R1    | phosphoinositide-3-kinase, regulatory subunit 1 (p85 alpha)                               |
| 9113   | LATS1     | LATS, large tumor suppressor, homolog 1 (Drosophila)                                      |
| 60401  | EDA2R     | ectodysplasin A2 receptor                                                                 |
| 7477   | WNT7B     | wingless-type MMTV integration site family, member 7B                                     |
| 26297  | SERGEF    | secretion regulating guanine nucleotide exchange factor                                   |
| 3357   | HTR2B     | 5-hydroxytryptamine (serotonin) receptor 2B                                               |
| 8359   | HIST1H4A  | histone cluster 1, H4a                                                                    |
| 2520   | GAST      | gastrin                                                                                   |
| 29992  | PILRA     | paired immunoglobulin-like type 2 receptor alpha                                          |
| 26269  | FBXO8     | F-box protein 8                                                                           |
| 1880   | EBI2      | Epstein-Barr virus induced gene 2 (lymphocyte-specific G protein-coupled receptor)        |
| 2719   | GPC3      | glypican 3                                                                                |
| 388558 | ZNF808    | zinc finger protein 808                                                                   |
| 53916  | RAB4B     | RAB4B, member RAS oncogene family                                                         |
| 3581   | IL9R      | interleukin 9 receptor                                                                    |
| 1230   | CCR1      | chemokine (C-C motif) receptor 1                                                          |
| 11245  | GPR176    | G protein-coupled receptor 176                                                            |
| 2147   | F2        | coagulation factor II (thrombin)                                                          |
| 1760   | DMPK      | dystrophin myotonic-protein kinase                                                        |
| 2050   | EPHB4     | EPH receptor B4                                                                           |
| 54210  | TREM1     | triggering receptor expressed on myeloid cells 1                                          |
| 3082   | HGF       | hepatocyte growth factor (hepapoietin A; scatter factor)                                  |
| 84870  | RSP03     | R-spondin 3 homolog (Xenopus laevis)                                                      |
| 166647 | GPR125    | G protein-coupled receptor 125                                                            |
| 27329  | ANGPTL3   | angiopoietin-like 3                                                                       |
| 11163  | NUDT4     | nudix (nucleoside diphosphate linked moiety X)-type motif 4                               |
| 23786  | BCL2L13   | BCL2-like 13 (apoptosis facilitator)                                                      |
| 2873   | GPS1      | G protein pathway suppressor 1                                                            |
| 6242   | RTKN      | rotenone                                                                                  |
| 28964  | GIT1      | G protein-coupled receptor kinase interactor 1                                            |
| 8366   | HIST1H4B  | histone cluster 1, H4b                                                                    |
| 5617   | PRL       | prolactin                                                                                 |
| 55600  | ITLN1     | intelectin 1 (galactofuranose binding)                                                    |
| 10673  | TNFSF13B  | tumor necrosis factor (ligand) superfamily, member 13b                                    |
| 719    | C3AR1     | complement component 3a receptor 1                                                        |
| 26959  | HBP1      | HMG-box transcription factor 1                                                            |
| 259    | AMBP      | alpha-1-microglobulin/bikunin precursor                                                   |
| 2870   | GRK6      | G protein-coupled receptor kinase 6                                                       |
| 23542  | MAPK8IP2  | mitogen-activated protein kinase 8 interacting protein 2                                  |
| 81844  | TRIM56    | tripartite motif-containing 56                                                            |
| 64780  | MICAL1    | microtubule associated monooxygenase, calponin and LIM domain containing 1                |
| 58475  | MS4A7     | membrane-spanning 4-domains, subfamily A, member 7                                        |
| 2219   | FCN1      | ficollin (collagen/fibrinogen domain containing) 1                                        |
| 56670  | SUCNR1    | succinate receptor 1                                                                      |
| 91614  | DEPDC7    | DEP domain containing 7                                                                   |
| 55843  | ARHGAP15  | Rho GTPase activating protein 15                                                          |
| 162989 | DEDD2     | death effector domain containing 2                                                        |
| 197    | AHSG      | alpha-2-HS-glycoprotein                                                                   |
| 2869   | GRK5      | G protein-coupled receptor kinase 5                                                       |
| 6907   | TBL1X     | transducin (beta)-like 1X-linked                                                          |
| 5149   | PDE6H     | phosphodiesterase 6H, cGMP-specific, cone, gamma                                          |
| 6362   | CCL18     | chemokine (C-C motif) ligand 18 (pulmonary and activation-regulated)                      |
| 6846   | XCL2      | chemokine (C motif) ligand 2                                                              |
| 2668   | GDNF      | glial cell derived neurotrophic factor                                                    |
| 10748  | KLRA1     | killer cell lectin-like receptor subfamily A, member 1                                    |
| 50836  | TAS2R8    | taste receptor, type 2, member 8                                                          |
| 4993   | OR2C1     | olfactory receptor, family 2, subfamily C, member 1                                       |
| 9970   | NR1I3     | nuclear receptor subfamily 1, group I, member 3                                           |
| 1142   | CHRNA3    | cholinergic receptor, nicotinic, beta 3                                                   |
| 3356   | HTR2A     | 5-hydroxytryptamine (serotonin) receptor 2A                                               |
| 10633  | RASL10A   | RAS-like, family 10, member A                                                             |
| 414060 | TBC1D3C   | TBC1 domain family, member 3C                                                             |

|        |           |                                                                            |
|--------|-----------|----------------------------------------------------------------------------|
| 10252  | SPRY1     | sprouty homolog 1, antagonist of FGF signaling (Drosophila)                |
| 5914   | RARA      | retinoic acid receptor, alpha                                              |
| 2034   | EPAS1     | endothelial PAS domain protein 1                                           |
| 767    | CA8       | carbonic anhydrase VIII                                                    |
| 4142   | MAS1      | MAS1 oncogene                                                              |
| 245802 | MS4A6E    | membrane-spanning 4-domains, subfamily A, member 6E                        |
| 2829   | XCR1      | chemokine (C motif) receptor 1                                             |
| 3354   | HTR1E     | 5-hydroxytryptamine (serotonin) receptor 1E                                |
| 5023   | P2RX1     | purinergic receptor P2X, ligand-gated ion channel, 1                       |
| 83550  | GPR101    | G protein-coupled receptor 101                                             |
| 26979  | PABPCP2   | poly(A) binding protein, cytoplasmic, pseudogene 2                         |
| 10270  | AKAP8     | A kinase (PRKA) anchor protein 8                                           |
| 4239   | MFAP4     | microfibrillar-associated protein 4                                        |
| 55023  | PHIP      | pleckstrin homology domain interacting protein                             |
| 1673   | DEFB4     | defensin, beta 4                                                           |
| 54900  | LAX1      | lymphocyte transmembrane adaptor 1                                         |
| 4908   | NTF3      | neurotrophin 3                                                             |
| 3952   | LEP       | leptin (obesity homolog, mouse)                                            |
| 2838   | GPR15     | G protein-coupled receptor 15                                              |
| 92     | ACVR2A    | activin A receptor, type IIA                                               |
| 10142  | AKAP9     | A kinase (PRKA) anchor protein (yotiao) 9                                  |
| 196    | AHR       | aryl hydrocarbon receptor                                                  |
| 55844  | PPP2R2D   | protein phosphatase 2, regulatory subunit B, delta isoform                 |
| 11035  | RIPK3     | receptor-interacting serine-threonine kinase 3                             |
| 154    | ADRB2     | adrenergic, beta-2-, receptor, surface                                     |
| 8361   | HIST1H4F  | histone cluster 1, H4f                                                     |
| 3562   | IL3       | interleukin 3 (colony-stimulating factor, multiple)                        |
| 4254   | KITLG     | KIT ligand                                                                 |
| 158800 | OTEX      | paired-like homeobox protein OTEX                                          |
| 51554  | CCRL1     | chemokine (C-C motif) receptor-like 1                                      |
| 8111   | GPR68     | G protein-coupled receptor 68                                              |
| 1269   | CNR2      | cannabinoid receptor 2 (macrophage)                                        |
| 10411  | RAPGEF3   | Rap guanine nucleotide exchange factor (GEF) 3                             |
| 5727   | PTCH1     | patched homolog 1 (Drosophila)                                             |
| 57019  | CIAPIN1   | cytokine induced apoptosis inhibitor 1                                     |
| 5739   | PTGIR     | prostaglandin I2 (prostacyclin) receptor (IP)                              |
| 6733   | SRPK2     | SFRS protein kinase 2                                                      |
| 796    | CALCA     | calcitonin/calcitonin-related polypeptide, alpha                           |
| 687    | KLF9      | Kruppel-like factor 9                                                      |
| 50838  | TAS2R13   | taste receptor, type 2, member 13                                          |
| 7200   | TRH       | thyrotropin-releasing hormone                                              |
| 9293   | GPR52     | G protein-coupled receptor 52                                              |
| 1142   | CHRNB3    | cholinergic receptor, nicotinic, beta 3                                    |
| 27299  | ADAMDEC1  | ADAM-like, decysin 1                                                       |
| 8874   | ARHGEF7   | Rho guanine nucleotide exchange factor (GEF) 7                             |
| 5792   | PTPRF     | protein tyrosine phosphatase, receptor type, F                             |
| 5032   | P2RY11    | purinergic receptor P2Y, G-protein coupled, 11                             |
| 1270   | CNTF      | ciliary neurotrophic factor                                                |
| 6778   | STAT6     | signal transducer and activator of transcription 6, interleukin-4 induced  |
| 8995   | TNFSF18   | tumor necrosis factor (ligand) superfamily, member 18                      |
| 54429  | TAS2R5    | taste receptor, type 2, member 5                                           |
| 114131 | UCN3      | urocortin 3 (stresscopin)                                                  |
| 566    | AZU1      | azurocidin 1 (cationic antimicrobial protein 37)                           |
| 89778  | SERPINB11 | serpin peptidase inhibitor, clade B (ovalbumin), member 11                 |
| 5062   | PAK2      | p21 (CDKN1A)-activated kinase 2                                            |
| 8809   | IL18R1    | interleukin 18 receptor 1                                                  |
| 11214  | AKAP13    | A kinase (PRKA) anchor protein 13                                          |
| 10395  | DLC1      | deleted in liver cancer 1                                                  |
| 7128   | TNFAIP3   | tumor necrosis factor, alpha-induced protein 3                             |
| 55586  | MIOX      | myo-inositol oxygenase                                                     |
| 2549   | GAB1      | GRB2-associated binding protein 1                                          |
| 9350   | CER1      | cerberus 1, cysteine knot superfamily, homolog (Xenopus laevis)            |
| 51471  | NAT8B     | N-acetyltransferase 8B (gene/pseudogene)                                   |
| 50604  | IL20      | interleukin 20                                                             |
| 9350   | CER1      | cerberus 1, cysteine knot superfamily, homolog (Xenopus laevis)            |
| 56603  | CYP26B1   | cytochrome P450, family 26, subfamily B, polypeptide 1                     |
| 55507  | GPRC5D    | G protein-coupled receptor, family C, group 5, member D                    |
| 4159   | MC3R      | melanocortin 3 receptor                                                    |
| 2893   | GRIA4     | glutamate receptor, ionotropic, AMPA 4                                     |
| 472    | ATM       | ataxia telangiectasia mutated (includes complementation groups A, C and D) |
| 3084   | NRG1      | neuregulin 1                                                               |
| 767    | CA8       | carbonic anhydrase VIII                                                    |
| 2695   | GIP       | gastric inhibitory polypeptide                                             |
| 9350   | CER1      | cerberus 1, cysteine knot superfamily, homolog (Xenopus laevis)            |
| 10251  | SPRY3     | sprouty homolog 3 (Drosophila)                                             |
| 5771   | PTPN2     | protein tyrosine phosphatase, non-receptor type 2                          |

|        |           |                                                                                                           |
|--------|-----------|-----------------------------------------------------------------------------------------------------------|
| 10803  | CCR9      | chemokine (C-C motif) receptor 9                                                                          |
| 116511 | MAS1L     | MAS1 oncogene-like                                                                                        |
| 5662   | PSD       | pleckstrin and Sec7 domain containing                                                                     |
| 83478  | ARHGAP24  | Rho GTPase activating protein 24                                                                          |
| 9034   | CCRL2     | chemokine (C-C motif) receptor-like 2                                                                     |
| 117195 | MRGPRX3   | MAS-related GPR, member X3                                                                                |
| 11221  | DUSP10    | dual specificity phosphatase 10                                                                           |
| 2832   | NPBWR2    | neuropeptides B/W receptor 2                                                                              |
| 2832   | NPBWR2    | neuropeptides B/W receptor 2                                                                              |
| 3558   | IL2       | interleukin 2                                                                                             |
| 2781   | GNAZ      | guanine nucleotide binding protein (G protein), alpha z polypeptide                                       |
| 10135  | PBEF1     | pre-B-cell colony enhancing factor 1                                                                      |
| 92     | ACVR2A    | activin A receptor, type IIA                                                                              |
| 3516   | RBPSUH    | recombining binding protein suppressor of hairless (Drosophila)                                           |
| 5792   | PTPRF     | protein tyrosine phosphatase, receptor type, F                                                            |
| 55357  | TBC1D2    | TBC1 domain family, member 2                                                                              |
| 64344  | HIF3A     | hypoxia inducible factor 3, alpha subunit                                                                 |
| 8605   | PLA2G4C   | phospholipase A2, group IVC (cytosolic, calcium-independent)                                              |
| 84218  | TBC1D3    | TBC1 domain family, member 3                                                                              |
| 2825   | GPR1      | G protein-coupled receptor 1                                                                              |
| 185    | AGTR1     | angiotensin II receptor, type 1                                                                           |
| 3676   | ITGA4     | integrin, alpha 4 (antigen CD49D, alpha 4 subunit of VLA-4 receptor)                                      |
| 64170  | CARD9     | caspase recruitment domain family, member 9                                                               |
| 10936  | GPR75     | G protein-coupled receptor 75                                                                             |
| 23092  | ARHGAP26  | Rho GTPase activating protein 26                                                                          |
| 6375   | XCL1      | chemokine (C motif) ligand 1                                                                              |
| 10160  | FARP1     | FERM, RhoGEF (ARHGEF) and pleckstrin domain protein 1 (chondrocyte-derived)                               |
| 140458 | ASB5      | ankyrin repeat and SOCS box-containing 5                                                                  |
| 55423  | SIRPG     | signal-regulatory protein gamma                                                                           |
| 54331  | GNG2      | guanine nucleotide binding protein (G protein), gamma 2                                                   |
| 780    | DDR1      | discoidin domain receptor family, member 1                                                                |
| 5337   | PLD1      | phospholipase D1, phosphatidylcholine-specific                                                            |
| 394    | ARHGAP5   | Rho GTPase activating protein 5                                                                           |
| 2828   | GPR4      | G protein-coupled receptor 4                                                                              |
| 10010  | TANK      | TRAF family member-associated NFKB activator                                                              |
| 8491   | MAP4K3    | mitogen-activated protein kinase kinase kinase kinase 3                                                   |
| 1809   | DPYSL3    | dihydropyrimidinase-like 3                                                                                |
| 284802 | MGC72104  | similar to FRG1 protein (FSHD region gene 1 protein)                                                      |
| 23580  | CDC42EP4  | CDC42 effector protein (Rho GTPase binding) 4                                                             |
| 1233   | CCR4      | chemokine (C-C motif) receptor 4                                                                          |
| 5580   | PRKCD     | protein kinase C, delta                                                                                   |
| 9824   | ARHGAP11A | Rho GTPase activating protein 11A                                                                         |
| 59067  | IL21      | interleukin 21                                                                                            |
| 9293   | GPR52     | G protein-coupled receptor 52                                                                             |
| 5577   | PRKAR2B   | protein kinase, cAMP-dependent, regulatory, type II, beta                                                 |
| 2048   | EPHB2     | EPH receptor B2                                                                                           |
| 3575   | IL7R      | interleukin 7 receptor                                                                                    |
| 286    | ANK1      | ankyrin 1, erythrocytic                                                                                   |
| 9113   | LATS1     | LATS, large tumor suppressor, homolog 1 (Drosophila)                                                      |
| 137196 | CCDC26    | coiled-coil domain containing 26                                                                          |
| 915    | CD3D      | CD3d molecule, delta (CD3-TCR complex)                                                                    |
| 23643  | LY96      | lymphocyte antigen 96                                                                                     |
| 1278   | COL1A2    | collagen, type I, alpha 2                                                                                 |
| 11250  | GPR45     | G protein-coupled receptor 45                                                                             |
| 3565   | IL4       | interleukin 4                                                                                             |
| 3593   | IL12B     | interleukin 12B (natural killer cell stimulatory factor 2, cytotoxic lymphocyte maturation factor 2, p40) |
| 1133   | CHRM5     | cholinergic receptor, muscarinic 5                                                                        |
| 284    | ANGPT1    | angiopoietin 1                                                                                            |
| 283    | ANG       | angiogenin, ribonuclease, RNase A family, 5                                                               |
| 112744 | IL17F     | interleukin 17F                                                                                           |
| 64759  | TNS3      | tensin 3                                                                                                  |
| 2888   | GRB14     | growth factor receptor-bound protein 14                                                                   |
| 8839   | WISP2     | WNT1 inducible signaling pathway protein 2                                                                |
| 9681   | DEPDC5    | DEP domain containing 5                                                                                   |
| 8294   | HIST1H4I  | histone cluster 1, H4i                                                                                    |
| 221938 | MMD2      | monocyte to macrophage differentiation-associated 2                                                       |
| 10888  | GPR83     | G protein-coupled receptor 83                                                                             |
| 672    | BRCA1     | breast cancer 1, early onset                                                                              |
| 3554   | IL1R1     | interleukin 1 receptor, type I                                                                            |
| 6868   | ADAM17    | ADAM metalloproteinase domain 17 (tumor necrosis factor, alpha, converting enzyme)                        |
| 10025  | THRAP5    | thyroid hormone receptor associated protein 5                                                             |
| 3458   | IFNG      | interferon, gamma                                                                                         |
| 27197  | GPR82     | G protein-coupled receptor 82                                                                             |
| 8412   | BCAR3     | breast cancer anti-estrogen resistance 3                                                                  |
| 79822  | ARHGAP28  | Rho GTPase activating protein 28                                                                          |

|        |           |                                                                                                            |
|--------|-----------|------------------------------------------------------------------------------------------------------------|
| 57231  | SNX14     | sorting nexin 14                                                                                           |
| 59067  | IL21      | interleukin 21                                                                                             |
| 2844   | GPR21     | G protein-coupled receptor 21                                                                              |
| 81876  | RAB1B     | RAB1B, member RAS oncogene family                                                                          |
| 472    | ATM       | ataxia telangiectasia mutated (includes complementation groups A, C and D)                                 |
| 55114  | ARHGAP17  | Rho GTPase activating protein 17                                                                           |
| 3084   | NRG1      | neuregulin 1                                                                                               |
| 3925   | STMN1     | stathmin 1/oncoprotein 18                                                                                  |
| 959    | CD40LG    | CD40 ligand (TNF superfamily, member 5, hyper-IgM syndrome)                                                |
| 10144  | FAM13A1   | family with sequence similarity 13, member A1                                                              |
| 659    | BMPR2     | bone morphogenetic protein receptor, type II (serine/threonine kinase)                                     |
| 5187   | PER1      | period homolog 1 (Drosophila)                                                                              |
| 6997   | TDGF1     | teratocarcinoma-derived growth factor 1                                                                    |
| 9293   | GPR52     | G protein-coupled receptor 52                                                                              |
| 84218  | TBC1D3    | TBC1 domain family, member 3                                                                               |
| 83873  | GPR61     | G protein-coupled receptor 61                                                                              |
| 4739   | NEDD9     | neural precursor cell expressed, developmentally down-regulated 9                                          |
| 9639   | ARHGEF10  | Rho guanine nucleotide exchange factor (GEF) 10                                                            |
| 4035   | LRP1      | low density lipoprotein-related protein 1 (alpha-2-macroglobulin receptor)                                 |
| 7145   | TNS1      | tensin 1                                                                                                   |
| 127255 | LRRC44    | leucine rich repeat containing 44                                                                          |
| 257019 | FRMD3     | FERM domain containing 3                                                                                   |
| 7484   | WNT9B     | wingless-type MMTV integration site family, member 9B                                                      |
| 2255   | FGF10     | fibroblast growth factor 10                                                                                |
| 5563   | PRKAA2    | protein kinase, AMP-activated, alpha 2 catalytic subunit                                                   |
| 1902   | EDG2      | endothelial differentiation, lysophosphatidic acid G-protein-coupled receptor, 2                           |
| 10922  | FASTK     | Fas-activated serine/threonine kinase                                                                      |
| 3576   | IL8       | interleukin 8                                                                                              |
| 10044  | SH2D3C    | SH2 domain containing 3C                                                                                   |
| 9912   | KIAA0672  | KIAA0672 gene product                                                                                      |
| 440456 | LOC440456 | similar to pleckstrin homology domain containing, family M (with RUN domain) member 1; adapter protein 162 |
| 91419  | XRCC6BP1  | XRCC6 binding protein 1                                                                                    |
| 9546   | APBA3     | amyloid beta (A4) precursor protein-binding, family A, member 3 (X11-like 2)                               |
| 4922   | NTS       | neurotensin                                                                                                |
| 65125  | WNK1      | WNK lysine deficient protein kinase 1                                                                      |
| 4651   | MYO10     | myosin X                                                                                                   |
| 2797   | GNRH2     | gonadotropin-releasing hormone 2                                                                           |
| 4846   | NOS3      | nitric oxide synthase 3 (endothelial cell)                                                                 |
| 2982   | GUCY1A3   | guanylate cyclase 1, soluble, alpha 3                                                                      |
| 25776  | CBY1      | chibby homolog 1 (Drosophila)                                                                              |
| 9465   | AKAP7     | A kinase (PRKA) anchor protein 7                                                                           |
| 9364   | RAB28     | RAB28, member RAS oncogene family                                                                          |
| 9034   | CCRL2     | chemokine (C-C motif) receptor-like 2                                                                      |
| 79444  | BIRC7     | baculoviral IAP repeat-containing 7 (livin)                                                                |
| 10981  | RAB32     | RAB32, member RAS oncogene family                                                                          |
| 3821   | KLRC1     | killer cell lectin-like receptor subfamily C, member 1                                                     |
| 1455   | CSNK1G2   | casein kinase 1, gamma 2                                                                                   |
| 7248   | TSC1      | tuberous sclerosis 1                                                                                       |
| 64284  | RAB17     | RAB17, member RAS oncogene family                                                                          |
| 221472 | FGD2      | FYVE, RhoGEF and PH domain containing 2                                                                    |
| 56923  | NMUR2     | neuromedin U receptor 2                                                                                    |
| 54849  | FLJ20186  | hypothetical protein FLJ20186                                                                              |
| 4828   | NMB       | neuromedin B                                                                                               |
| 1176   | AP3S1     | adaptor-related protein complex 3, sigma 1 subunit                                                         |
| 2207   | FCER1G    | Fc fragment of IgE, high affinity I, receptor for; gamma polypeptide                                       |
| 3597   | IL13RA1   | interleukin 13 receptor, alpha 1                                                                           |
| 51009  | DERL2     | Der1-like domain family, member 2                                                                          |
| 1837   | DTNA      | dystrobrevin, alpha                                                                                        |
| 8567   | MADD      | MAP-kinase activating death domain                                                                         |
| 221472 | FGD2      | FYVE, RhoGEF and PH domain containing 2                                                                    |
| 51463  | GPR89A    | G protein-coupled receptor 89A                                                                             |
| 2846   | GPR23     | G protein-coupled receptor 23                                                                              |
| 64232  | MS4A5     | membrane-spanning 4-domains, subfamily A, member 5                                                         |
| 10615  | SPAG5     | sperm associated antigen 5                                                                                 |
| 22861  | NLRP1     | NLR family, pyrin domain containing 1                                                                      |
| 974    | CD79B     | CD79b molecule, immunoglobulin-associated beta                                                             |
| 11123  | DSCR1L2   | Down syndrome critical region gene 1-like 2                                                                |
| 56961  | SHD       | Src homology 2 domain containing transforming protein D                                                    |
| 1457   | CSNK2A1   | casein kinase 2, alpha 1 polypeptide                                                                       |
| 5998   | RGS3      | regulator of G-protein signalling 3                                                                        |
| 23263  | MCF2L     | MCF.2 cell line derived transforming sequence-like                                                         |
| 4855   | NOTCH4    | Notch homolog 4 (Drosophila)                                                                               |
| 8200   | GDF5      | growth differentiation factor 5 (cartilage-derived morphogenetic protein-1)                                |
| 84290  | CAPNS2    | calpain, small subunit 2                                                                                   |
| 5598   | MAPK7     | mitogen-activated protein kinase 7                                                                         |



|        |          |                                                                                          |
|--------|----------|------------------------------------------------------------------------------------------|
| 29984  | RHOD     | ras homolog gene family, member D                                                        |
| 6781   | STC1     | stanniocalcin 1                                                                          |
| 10637  | LEFTY1   | left-right determination factor 1                                                        |
| 2274   | FHL2     | four and a half LIM domains 2                                                            |
| 924    | CD7      | CD7 molecule                                                                             |
| 1910   | EDNRB    | endothelin receptor type B                                                               |
| 9126   | SMC3     | structural maintenance of chromosomes 3                                                  |
| 26166  | RGS22    | regulator of G-protein signalling 22                                                     |
| 5781   | PTPN11   | protein tyrosine phosphatase, non-receptor type 11 (Noonan syndrome 1)                   |
| 23236  | PLCB1    | phospholipase C, beta 1 (phosphoinositide-specific)                                      |
| 1453   | CSNK1D   | casein kinase 1, delta                                                                   |
| 334    | APLP2    | amyloid beta (A4) precursor-like protein 2                                               |
| 9306   | SOCS6    | suppressor of cytokine signaling 6                                                       |
| 7124   | TNF      | tumor necrosis factor (TNF superfamily, member 2)                                        |
| 640    | BLK      | B lymphoid tyrosine kinase                                                               |
| 930    | CD19     | CD19 molecule                                                                            |
| 1388   | CREBL1   | cAMP responsive element binding protein-like 1                                           |
| 83874  | TBC1D10A | TBC1 domain family, member 10A                                                           |
| 2792   | GNGT1    | guanine nucleotide binding protein (G protein), gamma transducing activity polypeptide 1 |
| 4867   | NPHP1    | nephronophthisis 1 (juvenile)                                                            |
| 8877   | SPHK1    | sphingosine kinase 1                                                                     |
| 4660   | PPP1R12B | protein phosphatase 1, regulatory (inhibitor) subunit 12B                                |
| 27133  | KCNH5    | potassium voltage-gated channel, subfamily H (eag-related), member 5                     |
| 27289  | RND1     | Rho family GTPase 1                                                                      |
| 5877   | RABIF    | RAB interacting factor                                                                   |
| 162989 | DEDD2    | death effector domain containing 2                                                       |
| 10769  | PLK2     | polo-like kinase 2 (Drosophila)                                                          |
| 9158   | FIBP     | fibroblast growth factor (acidic) intracellular binding protein                          |
| 115827 | RAB3C    | RAB3C, member RAS oncogene family                                                        |
| 53347  | UBASH3A  | ubiquitin associated and SH3 domain containing, A                                        |
| 127255 | LRRRC44  | leucine rich repeat containing 44                                                        |
| 391257 | SUMO1P1  | SUMO1 pseudogene 1                                                                       |
| 9844   | ELMO1    | engulfment and cell motility 1                                                           |
| 10458  | BAIAP2   | BAI1-associated protein 2                                                                |
| 5536   | PPP5C    | protein phosphatase 5, catalytic subunit                                                 |
| 57826  | RAP2C    | RAP2C, member of RAS oncogene family                                                     |
| 4915   | NTRK2    | neurotrophic tyrosine kinase, receptor, type 2                                           |
| 3654   | IRAK1    | interleukin-1 receptor-associated kinase 1                                               |
| 3248   | HPGD     | hydroxyprostaglandin dehydrogenase 15-(NAD)                                              |
| 4869   | NPM1     | nucleophosmin (nucleolar phosphoprotein B23, numatrin)                                   |
| 1813   | DRD2     | dopamine receptor D2                                                                     |
| 26575  | RGS17    | regulator of G-protein signalling 17                                                     |
| 1072   | CFL1     | cofilin 1 (non-muscle)                                                                   |
| 9138   | ARHGEF1  | Rho guanine nucleotide exchange factor (GEF) 1                                           |
| 9440   | CRSP6    | cofactor required for Sp1 transcriptional activation, subunit 6, 77kDa                   |
| 30819  | KCNIP2   | Kv channel interacting protein 2                                                         |
| 1241   | LTB4R    | leukotriene B4 receptor                                                                  |
| 51523  | CXXC5    | CXXC finger 5                                                                            |
| 5296   | PIK3R2   | phosphoinositide-3-kinase, regulatory subunit 2 (p85 beta)                               |
| 4692   | NDN      | necdin homolog (mouse)                                                                   |
| 537    | ATP6AP1  | ATPase, H <sup>+</sup> transporting, lysosomal accessory protein 1                       |
| 6885   | MAP3K7   | mitogen-activated protein kinase kinase kinase 7                                         |
| 6923   | TCEB2    | transcription elongation factor B, 2                                                     |
| 55336  | FBXL8    | F-box and leucine-rich repeat protein 8                                                  |
| 84261  | FBXW9    | F box and WD 40 domain protein 9                                                         |
| 54328  | GPR173   | G protein-coupled receptor 173                                                           |
| 4919   | ROR1     | receptor tyrosine kinase-like orphan receptor 1                                          |
| 5923   | RASGRF1  | Ras protein-specific guanine nucleotide-releasing factor 1                               |
| 9182   | PAMCI    | peptidylglycine alpha-amidating monooxygenase COOH-terminal interactor                   |
| 356    | FASLG    | Fas ligand (TNF superfamily, member 6)                                                   |
| 3588   | IL10RB   | interleukin 10 receptor, beta                                                            |
| 51026  | GOLT1B   | golgi transport 1 homolog B (S. cerevisiae)                                              |
| 10817  | FRS3     | fibroblast growth factor receptor substrate 3                                            |
| 308    | ANXA5    | annexin A5                                                                               |
| 10491  | CRTAP    | cartilage associated protein                                                             |
| 11031  | RAB31    | RAB31, member RAS oncogene family                                                        |
| 595    | CCND1    | cyclin D1                                                                                |
| 6693   | SPN      | sialophorin (leukosialin, CD43)                                                          |
| 306    | ANXA3    | annexin A3                                                                               |
| 8717   | TRADD    | TNFRSF1A-associated via death domain                                                     |
| 7423   | VEGFB    | vascular endothelial growth factor B                                                     |
| 10293  | TRAI     | TRAF interacting protein                                                                 |
| 1500   | CTNND1   | catenin (cadherin-associated protein), delta 1                                           |
